1 **Structural and functional insights into nitrosoglutathione reductase from**  
2 ***Chlamydomonas reinhardtii***

3

4 Andrea Tagliani<sup>1,2,#,†</sup>, Jacopo Rossi<sup>1,#</sup>, Christophe H. Marchand<sup>2,3</sup>, Marcello De Mia<sup>2,†</sup>,  
5 Daniele Tedesco<sup>1,†</sup>, Gurrieri Libero<sup>1</sup>, Maria Meloni<sup>1</sup>, Giuseppe Falini<sup>4</sup>, Paolo Trost<sup>1</sup>,  
6 Stéphane D. Lemaire<sup>2,5,\*</sup>, Simona Fermani<sup>4,6,\*</sup> and Mirko Zaffagnini<sup>1,\*</sup>

7

8 <sup>1</sup> Department of Pharmacy and Biotechnologies, University of Bologna, I-40126 Bologna,  
9 Italy.

10 <sup>2</sup> CNRS, Sorbonne Université, Institut de Biologie Physico-Chimique, UMR8226, F-75005,  
11 Paris, France

12 <sup>3</sup> CNRS, Institut de Biologie Physico-Chimique, Plateforme de Protéomique, FR550, F-  
13 75005, Paris, France

14 <sup>4</sup> Department of Chemistry “G. Ciamician”, University of Bologna, I-40126 Bologna, Italy.

15 <sup>5</sup> Sorbonne Université, CNRS, Institut de Biologie Paris-Seine, Laboratory of  
16 Computational and Quantitative Biology, UMR7238, F-75005, Paris, France

17 <sup>6</sup> CIRI Health Sciences & Technologies (HST), University of Bologna, I-40064 Bologna,  
18 Italy

19

20 # These authors contributed equally to this work

21

22 † Current addresses: PlantLab, Institute of Life Sciences, Scuola Superiore Sant’Anna,  
23 Pisa Italy (AT); Laboratoire physiologie cellulaire et vegetale, UMR 5168, CEA/CNRS,  
24 INRAE, UGA, 38054, Grenoble, France (MDM); Institute for Organic Synthesis and  
25 Photoreactivity - National Research Council (ISOF-CNR), 40129 Bologna, Italy (DT).

26

27 \* Corresponding authors: [stephane.lemaire@ibpc.fr](mailto:stephane.lemaire@ibpc.fr) (SDL), [simona.fermani@unibo.it](mailto:simona.fermani@unibo.it) (SF),  
28 and [mirko.zaffagnini3@unibo.it](mailto:mirko.zaffagnini3@unibo.it) (MZ).

29

30

31 **Running title:** Structural and biochemical features of algal GSNOR

32

33

34 **One-sentence summary**

35 GSNOR1 from *Chlamydomonas reinhardtii* displays an unusual variability of the catalytic  
36 zinc coordination environment and an unexpected resistance to thiol-based redox  
37 modifications

38

39

40 **AUTHOR CONTRIBUTION**

41 AT, JR, CHM, SDL, SF, and MZ designed the research; AT, JR, CHM, MDM, DT, GL, MM,  
42 SF, and MZ performed the research; AT, JR, CHM, MDM, DT, SDL, SF, and MZ analyzed  
43 the data; and AT, JR, CHM, DT, SDL, SF, and MZ wrote the paper. All authors have read  
44 and agreed to the current version of the manuscript.

45

46 **ABSTRACT**

47 Protein S-nitrosylation plays a fundamental role in cell signaling and nitrosoglutathione  
48 (GSNO) is considered as the main nitrosylating signaling molecule. Enzymatic systems  
49 controlling GSNO homeostasis are thus crucial to indirectly control the formation of protein  
50 S-nitrosothiols. GSNO reductase (GSNOR) is the key enzyme controlling GSNO levels by  
51 catalyzing its degradation in the presence of NADH. Here, we found that protein extracts  
52 from the microalga *Chlamydomonas reinhardtii* catabolize GSNO *via* two enzymatic  
53 systems having specific reliance on NADPH or NADH and different biochemical features.  
54 Scoring the *Chlamydomonas* genome for orthologs of known plant GSNORs, we found  
55 two genes encoding for putative and almost identical GSNOR isoenzymes. One of the two,  
56 here named CrGSNOR1, was heterologously expressed and purified. The kinetic  
57 properties of CrGSNOR1 were determined and the high-resolution three-dimensional  
58 structures of the apo and NAD<sup>+</sup>-bound forms of the enzyme were solved. These analyses  
59 revealed that CrGSNOR1 has a strict specificity towards GSNO and NADH, and a  
60 conserved 3D-folding with respect to other plant GSNORs. The catalytic zinc ion, however,  
61 showed an unexpected variability of the coordination environment. Furthermore, we  
62 evaluated the catalytic response of CrGSNOR1 to thermal denaturation, thiol-modifying  
63 agents and oxidative modifications as well as the reactivity and position of accessible  
64 cysteines. Despite being a cysteine-rich protein, CrGSNOR1 contains only two solvent-  
65 exposed/reactive cysteines. Oxidizing and nitrosylating treatments have null or limited  
66 effects on CrGSNOR1 activity, highlighting a certain resistance of the algal enzyme to  
67 redox modifications. The molecular mechanisms and structural features underlying the  
68 response to thiol-based modifications are discussed.

69

## 70 INTRODUCTION

71 Nitric oxide ( $\bullet\text{NO}$ ) is a relatively stable free radical widely recognized as a signaling  
72 molecule in oxygenic phototrophs where it controls multiple physiological processes (e.g.  
73 development, stomatal closure, tolerance to metal toxicity, and adaptive response to  
74 abiotic and biotic stresses) (Neill et al., 2008; Bellin et al., 2013; Umbreen et al., 2018;  
75 Ageeva-Kieferle et al., 2019; Del Castello et al., 2019; Li et al., 2019; Kuo et al., 2020; Yu  
76 et al., 2020). The biological actions of  $\bullet\text{NO}$  are mainly exerted by NO-derived reactive  
77 molecules through their ability to react with proteins and trigger the formation of post-  
78 translational modifications (PTMs) (Besson-Bard et al., 2008; Begara-Morales et al., 2016;  
79 Feng et al., 2019; Gupta et al., 2020). The major reaction consists in the reversible  
80 formation of a nitrosothiol ( $-\text{SNO}$ ) between a NO moiety and a protein thiol ( $-\text{SH}$ ), in a  
81 process named S-nitrosylation (Zaffagnini et al., 2019).

82 Protein S-nitrosylation has emerged as an important regulatory process in plants and  
83 hundreds of proteins have been identified as putative S-nitrosylated targets both *in vitro*  
84 and *in vivo* (Lindermayr et al., 2005; Astier et al., 2012; Zaffagnini et al., 2013; Morisse et  
85 al., 2014; Yu et al., 2014; Zaffagnini et al., 2014; Zaffagnini et al., 2016; Huang et al.,  
86 2019; Skelly et al., 2019). However,  $\bullet\text{NO}$  itself cannot directly react with cysteine thiols, but  
87 can readily condense with oxygen leading to the formation of nitrogen dioxide ( $\bullet\text{NO}_2$ ).  
88 Subsequently,  $\bullet\text{NO}_2$  can react with  $\bullet\text{NO}$  to form dinitrogen trioxide ( $\text{N}_2\text{O}_3$ ) that can induce  
89 S-nitrosothiol formation by reacting with sulfur atoms of low-molecular weight thiols and  
90 protein cysteines (Zaffagnini et al., 2016). Considering the high intracellular concentration  
91 of reduced glutathione (GSH;  $\gamma\text{-Glu-Cys-Gly}$ ) (1-5 mM; (Rouhier et al., 2008; Noctor et al.,  
92 2012)), nitrosogluthathione (GSNO) is suggested to be the most abundant intracellular low-  
93 molecular weight S-nitrosothiol (Airaki et al., 2011; Corpas et al., 2013). GSNO is a quite  
94 stable NO-carrying molecule that is considered as the major NO reservoir in both plant and  
95 animal cells (Broniowska et al., 2013; Corpas et al., 2013). In addition, GSNO can donate  
96 its NO moiety to protein cysteines through a trans-nitrosylation reaction (Zaffagnini et al.,  
97 2019). Due to GSNO reactivity, its intracellular concentration must be tightly regulated to  
98 avoid uncontrolled accumulation of S-nitrosylated proteins that might cause severe  
99 perturbations of cell metabolism and signaling. In animals, several enzymes were shown  
100 to catabolize GSNO, including thioredoxin (TRX) (Sengupta and Holmgren, 2012),  
101 glutaredoxin (GRX) (Ren et al., 2019), superoxide dismutase (SOD) (Okado-Matsumoto  
102 and Fridovich, 2007; Lushchak et al., 2009) nitrosogluthathione reductase (GSNOR) (Liu et  
103 al., 2001), human carbonyl reductase 1 (HsCBR1) (Bateman et al., 2008), and the recently

104 described aldo-keto reductase family 1 member A1 (HsAKR1A1) (Stomberski et al., 2019).  
105 Unlike TRX, GRX, and SOD, which catalyze the reduction of GSNO yielding GSH and  
106 other NO-derived molecules as final products, GSNOR along with HsCBR1 and  
107 HsAKR1A1 catalyze the irreversible conversion of GSNO to N-hydroxysulfonamide  
108 (GSNHOH), an unstable intermediate that, in the presence of reduced glutathione (GSH),  
109 yields oxidized glutathione (GSSG) and hydroxylamine (Liu et al., 2001; Kubienova et al.,  
110 2013; Zaffagnini et al., 2016). For this reason, GSNOR acts as a scavenging system of  
111 intracellular GSNO, thereby indirectly influencing the extent of protein S-nitrosylation  
112 (Lindermayr, 2017; Jahnova et al., 2019). Consistently, yeast strains, mice, *Arabidopsis*  
113 *thaliana* and *Lotus japonicus* plants deficient for GSNOR exhibited increased levels of  
114 protein S-nitrosothiols (SNOs) (Liu et al., 2004; Feechan et al., 2005; Foster et al., 2009;  
115 Matamoros et al., 2020), while a decrease of SNO levels was observed in plants  
116 overexpressing GSNOR (Lin et al., 2012). Overall, these data suggest that GSNO  
117 positively correlates with S-nitrosylated proteins *in vivo*, and that GSNOR is an enzymatic  
118 scavenging system capable of regulating GSNO levels in different organisms including  
119 plants.

120 GSNOR belongs to the class-III alcohol dehydrogenase family and can be found in most  
121 bacteria and all eukaryotes including photosynthetic organisms (Liu et al., 2001). This  
122 enzyme was originally identified as a glutathione-dependent formaldehyde dehydrogenase  
123 and then reclassified as an S-(hydroxymethyl)glutathione (HMGSH) dehydrogenase.  
124 Lately, it was found to participate in GSNO catabolism by catalyzing GSNO reduction  
125 using NADH as electron donor (Jensen et al., 1998; Liu et al., 2001; Sakamoto et al.,  
126 2002; Kubienova et al., 2013). In photosynthetic organisms, GSNOR is generally localized  
127 in the cytoplasm and encoded by a single gene (Lee et al., 2008), with few exceptions  
128 including poplar, *Lotus japonicus* and *Chlamydomonas reinhardtii* which contain two  
129 GSNOR nuclear genes (Merchant et al., 2007; Xu et al., 2013; Cheng et al., 2015). Crystal  
130 structures show that GSNOR is a homodimeric protein containing two zinc ions per  
131 monomer having either a catalytic or a structural role (Sanghani et al., 2002; Kubienova et  
132 al., 2013; Jahnova et al., 2019).

133 Recently, several studies reported that *Arabidopsis* and poplar GSNOR undergo S-  
134 nitrosylation *in vivo* under conditions of increased endogenous NO levels (Frungillo et al.,  
135 2014; Cheng et al., 2015). Moreover, this modification affects GSNOR activity following  
136 exposure of *Arabidopsis* leaf extracts to NO-donors (Frungillo et al., 2014) and is  
137 controlled by GSH as proven by both *in vitro* and genetic studies *in vivo* (Zhang et al.,

138 2020). The kinetics and structural effects of S-nitrosylation on GSNOR from Arabidopsis  
139 have been reported and the nitrosylated cysteine residues identified (Cys10, 271, and  
140 370) (Guerra et al., 2016). The specific S-nitrosylation of Cys10 triggers AtGSNOR  
141 degradation through autophagy under hypoxic conditions (Zhan et al., 2018). In addition,  
142 the redox modification of Cys10 occurs through a trans-nitrosylation reaction involving  
143 catalase 3 (Chen et al., 2020). Differently, in the leguminosae *Lotus japonicus*, the two  
144 GSNOR isoforms were found to be target of S-nitrosylation without effect on protein  
145 catalysis (Matamoros et al., 2020). Plant GSNORs were also found to be inhibited by *in*  
146 *vitro* treatments with hydrogen peroxide (Kovacs et al., 2016; Ticha et al., 2017;  
147 Matamoros et al., 2020) or after exposure of Arabidopsis and *Baccaurea ramiflora* plants  
148 to the pro-oxidant herbicide paraquat and exogenous hydrogen peroxide, respectively (Bai  
149 et al., 2012; Kovacs et al., 2016). Altogether, these results suggest that most plant  
150 GSNORs are responsive to oxidative modifications and transient inhibition of their activity  
151 might represent an important mechanism to control GSNO accumulation with an ensuing  
152 impact on intracellular GSNO/SNO levels.

153 In green microalgae such as *Chlamydomonas reinhardtii*, NO signaling participates in the  
154 regulation of nutrients acquisition, photosynthetic efficiency, and other processes including  
155 autophagy and cell death (Sanz-Luque et al., 2013; Wei et al., 2014; Calatrava et al.,  
156 2017; Zalutskaya et al., 2018; De Mia et al., 2019; Kuo et al., 2020), making its  
157 understanding of particular interest for biotechnological purposes. Recently, GSNO  
158 reducing activity has been measured in *Chlamydomonas reinhardtii* extracts following  
159 exposure to salt stress (Chen et al., 2016), but the underlying enzymes along with their  
160 functional features are yet to be uncovered.

161 In this work, we identified the enzymatic systems catalyzing GSNO degradation in *C.*  
162 *reinhartii* protein extracts. Genome mining confirmed the presence in *Chlamydomonas* of  
163 two nuclear-encoded genes for putative GSNOR isozymes sharing more than 99% of  
164 sequence identity. Algal GSNOR1 (*Cre12.g543400*) was cloned and expressed, and its  
165 biochemical and structural features determined. Despite being rich in cysteine residues (16  
166 Cys out of 378 total residues), CrGSNOR1 contains only two solvent-exposed/reactive  
167 cysteines and its activity is almost unaffected by *in vitro* oxidative and nitrosative  
168 treatments, suggesting that the algal enzyme is resistant to redox modifications. Based on  
169 our findings, we provide functional and structural insights into the response of CrGSNOR1  
170 to cysteine-based modifications.

171

172

## 173 **MATERIAL AND METHODS**

174

### 175 **Chemicals**

176 Proteomics grade Trypsin Gold was obtained from Promega. Desalting columns (NAP-5  
177 and PD-10) and N-[6-(Biotinamido)hexyl]-3'-(2'-pyridyldithio)propionamide (HPDP-biotin)  
178 were purchased from GE Healthcare and Pierce, respectively. All chemicals were obtained  
179 from Sigma-Aldrich unless otherwise specified.

180

### 181 **Synthesis of S-nitrosoglutathione**

182 GSNO was synthesized from commercial glutathione via an acid-catalyzed nitrosation  
183 reaction as previously described in (Hart, 1985). Briefly, commercial glutathione (3.065 g)  
184 was dissolved in 21 ml of a 476 mM hydrochloric acid solution and kept on ice. Sodium  
185 nitrite (0.691 g) was added at once and the mixture was kept under stirring for 45 min and  
186 protected from light. Then, 10 ml of acetone were added to the red slurry and kept under  
187 stirring for an additional 10 min. The slurry was filtered on a glass frit and the precipitate  
188 was washed with prechilled distilled water (4 x 20 ml), acetone (3 x 20 ml) and diethyl  
189 ether (3 x 20 ml). Water and solvent traces were removed under vacuum for 24 h and the  
190 powder (avg. yield 70%) was kept at -20°C in the presence of desiccant. GSNO purity was  
191 assessed by <sup>1</sup>H-NMR and the concentration was determined spectrophotometrically using  
192 molar extinction coefficients of 920 M<sup>-1</sup> cm<sup>-1</sup> and 15.9 M<sup>-1</sup> cm<sup>-1</sup> at 335 nm and 545 nm,  
193 respectively.

194

### 195 **Cell culture, growth conditions and protein extraction**

196 Conditions for Chlamydomonas cultures and protein extraction were adapted from  
197 (Morisse et al., 2014). Briefly, the Chlamydomonas D66 cell-wall-less strain (CC-4425 cw  
198 nit2-203mt+ strain) was grown in Tris-acetate phosphate (TAP) medium under continuous  
199 light (80 μE m<sup>-2</sup> s<sup>-1</sup>) at 25 °C up to 4-5 x 10<sup>6</sup> cells ml<sup>-1</sup>. Cultures were then pelleted (4000  
200 g, 5 min) and resuspended in 50 mM Tris-HCl pH 7.9. Total soluble proteins were then  
201 extracted by three cycles of freeze/thaw in liquid nitrogen. The protein extract was then

202 clarified by centrifugation (15000 *g* for 10 min at 4 °C) and protein concentration was  
203 assessed by BCA Protein Assay using bovine serum albumin (BSA) as standard.

204

### 205 **NAD(P)H-dependent GSNO reductase activity in protein extracts**

206 The NAD(P)H-dependent GSNO reductase activity was measured adding variable  
207 amounts of freshly prepared protein extracts (0.125-1 mg) in a reaction mixture (1 ml)  
208 containing 50 mM Tris-HCl pH 7.9, 0.2 mM NAD(P)H and 0.4 mM GSNO. The activity was  
209 determined spectrophotometrically following NAD(P)H oxidation at 340 nm using a molar  
210 extinction coefficient of 7060 M<sup>-1</sup> cm<sup>-1</sup> at 340 nm, which includes both NAD(P)H and  
211 GSNO absorbance. The linear rate of the reaction was corrected with a reference rate  
212 without GSNO. Activity measurements were performed at least in three biological  
213 triplicates using 1 cm path length cuvettes.

214

### 215 **Thiol-modifying treatments and thermal stability of protein extracts**

216 Freshly prepared protein extracts (500 µg) were incubated at 25 °C in 50 mM Tris-HCl, pH  
217 7.9 in the presence of 1 mM N-ethylmaleimide (NEM) or 1 mM and methyl  
218 methanethiosulfonate (MMTS). At the indicated times, aliquots (10-50 µl) were withdrawn  
219 to carry out activity measurements as described above. Control experiments were  
220 performed by incubating protein extracts in the presence of 2 mM reduced DTT. Thermal  
221 stability was carried out by incubating protein extracts (500 µg) for 5 min from 40 °C up to  
222 80 °C with 10 °C increments. Subsequently, protein samples were centrifuged (15000 *g* for  
223 5 min at 4 °C) to remove precipitated proteins, and the NAD(P)H-dependent activities were  
224 monitored as described above. Control experiments were performed by incubating protein  
225 extracts at 25 °C following the centrifugation step.

226

### 227 **Cloning, expression and purification of CrGSNOR1**

228 The coding sequence for *CrGSNOR1* (locus *Cre12.g543400*) was amplified by standard  
229 RT-PCR on *Chlamydomonas* total RNA extracts using a forward primer introducing an  
230 *NdeI* restriction site (in bold) at the start codon: 5'-  
231 CATGCC**CATATG**TCGGAAACTGCAGGCAAG-3' and a reverse primer introducing a  
232 *Bam*HI restriction site (in bold) downstream of the stop codon: 5'-  
233 CATGCC**GGATCC**CTAGAACGTCAGCACACA-3'. *CrGSNOR1* was cloned in a modified



234 pET-3c vector (Pasquini et al., 2017) containing additional codons upstream of the *NdeI*  
235 site to express a His-tagged protein with seven N-terminal histidines. The sequence was  
236 checked by sequencing. Recombinant CrGSNOR1 was produced using the pET-3c-  
237 His/BL21 expression system. Bacteria were grown in LB medium supplemented with 100  
238  $\mu\text{g ml}^{-1}$  ampicillin at 37 °C and the production was induced with 100  $\mu\text{M}$  isopropyl  $\beta$ -D-1-  
239 thiogalactopyranoside overnight at 30°C. Cells were then harvested by centrifugation  
240 (5000 *g* for 10 min) and resuspended in 50 mM Tris-HCl pH 7.9. Cell lysis was performed  
241 using a French press ( $6.9 \times 10^7$  Pa) and cell debris were removed by centrifugation (5000  
242 *g* for 15 min). To avoid nucleic acids contamination, the sample was incubated with RNase  
243 ( $0.01 \text{ mg ml}^{-1}$ ) and DNase ( $0.04 \text{ U ml}^{-1}$ ) for 30 min at RT under mild shaking. The  
244 supernatant was then centrifuged at 15000 *g* for 30 min and applied onto a  $\text{Ni}^{2+}$  Hitrap  
245 chelating resin (HIS-Select Nickel Affinity Gel; Sigma-Aldrich) equilibrated with 30 mM  
246 Tris-HCl pH 7.9 containing 500 mM NaCl (TN buffer) and 5 mM imidazole. The  
247 recombinant protein was purified according to the manufacturer's instructions. The  
248 molecular mass and purity of the protein were analyzed by SDS-PAGE after desalting with  
249 PD-10 columns equilibrated with 30 mM Tris-HCl pH 7.9. The concentration of CrGSNOR1  
250 was determined spectrophotometrically using a molar extinction coefficient at 280 nm ( $\epsilon_{280}$ )  
251 of  $40910 \text{ M}^{-1} \text{ cm}^{-1}$ . The resulting homogeneous protein solutions were stored at -20 °C.

252

### 253 **Enzymatic assays for GSNOR activities**

254 The catalytic activity of purified CrGSNOR1 was measured spectrophotometrically as  
255 described above. The reaction was initiated by the addition of CrGSNOR1 at a final  
256 concentration ranging from 5 to 50 nM. The NADH-dependent activity of CrGSNOR1 was  
257 also assayed in the presence of oxidized glutathione (0.4 or 4 mM) or 0.2 mM NADPH  
258 instead of GSNO or NADH, respectively. S-(hydroxymethyl)glutathione (HMGS)H  
259 oxidation by CrGSNOR1 was assessed following the procedure described in (Sanghani et  
260 al., 2006). Briefly, the activity was determined spectrophotometrically following  $\text{NAD}^+$   
261 reduction in a reaction mixture containing 50 mM Tris-HCl pH 7.9, 0.2 mM  $\text{NAD}^+$  and 1 mM  
262 HMGS. The activity was measured as the increase in absorbance at 340 nm using a  $\epsilon_{340}$   
263 of  $6220 \text{ M}^{-1} \text{ cm}^{-1}$ .

264

### 265 **Kinetic properties of CrGSNOR1**

266 Steady-state kinetic analysis was accomplished by varying the concentrations of NADH  
267 (0.005-0.2 mM) at a fixed GSNO concentration (0.4 mM) and the concentration of GSNO  
268 (0.0125-0.4 mM) at a fixed concentration of NADH (0.2 mM). The reaction was started by  
269 adding 25 nM CrGSNOR1. Three independent experiments were performed at each  
270 substrate concentration and apparent kinetic parameters ( $K'_m$  and  $k'_{cat}$ ) were calculated by  
271 nonlinear regression using the Michaelis-Menten equation with the program CoStat  
272 (CoHort Software, Monterey, CA).

273

#### 274 **Thermal stability of purified CrGSNOR1**

275 The thermostability of purified CrGSNOR1 (5  $\mu$ M) was assessed by measuring protein  
276 activity after 30 min incubation of the enzyme at temperatures ranging from 25  $^{\circ}$ C up to  
277 75  $^{\circ}$ C with 5  $^{\circ}$ C increments. Kinetics of CrGSNOR1 aggregation were assessed by  
278 measuring the increase of turbidity at 405 nm. CrGSNOR1 samples were incubated in 30  
279 mM Tris-HCl, pH 7.9 at the indicated temperatures in a low-protein-binding 96-well plate.  
280 Samples were monitored at interval times and turbidity was measured using a plate reader  
281 (Victor3 Multilabeling Counter; Perkin-Elmer).

282

#### 283 **Thiol-modifying treatments of CrGSNOR1**

284 Treatments were performed at room temperature by incubating purified CrGSNOR1 (5  
285  $\mu$ M) in 50 mM Tris-HCl, pH 7.9 in the presence of NEM and MMTS at 1 mM. After 30 min  
286 incubation, aliquots were withdrawn to assay GSNOR activity as described above.

287

#### 288 **Alkylation of CrGSNOR1 by maleimide-based reagents**

289 Recombinant CrGSNOR1 (10  $\mu$ M) was incubated in 30 mM Tris-HCl, pH 7.9 at room  
290 temperature in the presence of either 1 mM N-ethyl maleimide (100 mM stock solution  
291 prepared in water) or 1 mM Biotin-maleimide (50 mM stock solution prepared in DMSO).  
292 At indicated time points (20, 30, 60, 90 min) DTT (10 mM) was added to quench maleimide  
293 derivatives.

294

#### 295 **In-solution trypsin digestion**

296 Alkylated CrGSNOR1 (100  $\mu$ l) was immediately desalted by gel filtration using NAP-5  
297 columns equilibrated in water as recommended by the supplier. Then, the desalted protein  
298 samples (ca. 500  $\mu$ l) were concentrated using a SpeedVac concentrator. CrGSNOR1  
299 concentration was determined spectrophotometrically before a 3 h digestion step with  
300 trypsin (1:20 (w/w) enzyme:substrate ratio) in 25 mM ammonium bicarbonate (AMBIC).  
301 Trypsin digestion was stopped either by heating at 95 °C for 3 min or by ultrafiltration using  
302 0.5 ml Amicon Ultra centrifugal devices (20 kDa MWCO, Millipore). A five microliters  
303 aliquot was kept for MALDI-TOF MS analysis and the rest was used for the enrichment of  
304 biotinylated peptides by affinity chromatography.

305

### 306 **Affinity purification of cysteinyl peptides alkylated by Biotin-maleimide**

307 Affinity purification was performed as previously described in (Pérez-Pérez et al., 2017)  
308 with slight modifications. Briefly, around 75  $\mu$ l of monomeric avidin agarose (Pierce) were  
309 packed into a gel-loading tip and further equilibrated with 200 mM NaCl in 25 mM AMBIC  
310 (loading buffer). Peptide mixture was supplemented with 200 mM NaCl before loading by  
311 centrifugation (20 °C, 1 min, 40 g). The flow through was kept and reloaded three times.  
312 Then, avidin agarose was extensively washed by centrifugation with 4 x 150  $\mu$ l of loading  
313 buffer and 4 x 150  $\mu$ l of 25 mM AMBIC in 20% methanol. Peptides retained onto the  
314 packed monomeric avidin column were eluted using 150  $\mu$ l of 0.4% trifluoroacetic acid  
315 (TFA) in 30% acetonitrile (ACN) and were directly analyzed by MALDI-TOF without further  
316 treatment.

317

### 318 **MALDI-TOF MS analyses**

319 Mass spectrometry experiments were performed as previously described in (Marchand et  
320 al., 2019; Shao et al., 2019). Briefly, for analysis of intact proteins by mass spectrometry, 1  
321  $\mu$ l of protein sample (previously quenched with DTT as described above) was taken and  
322 mixed with 2  $\mu$ l of a saturated solution of sinapinic acid in 30/0.3 ACN/TFA. Two microliters  
323 of this premix were spotted onto the sample plate and allowed to dry under a gentle air  
324 stream at room temperature. Spectra were acquired in positive linear mode on an Axima  
325 Performance MALDI-TOF/TOF mass spectrometer (Shimadzu-Kratos, Manchester, UK)  
326 with a pulse extraction fixed at 50000. Mass determination was performed after external  
327 calibration using mono-charged and dimer ions of yeast enolase.

328

### 329 **Treatments of CrGSNOR1 with oxidizing or nitrosylating agents**

330 Oxidizing and nitrosylating treatments were performed at 25 °C by incubating purified  
331 CrGSNOR1 (5 µM) in 50 mM Tris-HCl, pH 7.9 in the presence of 1 mM hydrogen peroxide  
332 (H<sub>2</sub>O<sub>2</sub>), or 1 mM diamide (TMAD), or 2 mM GSNO, or SNAP (0.2 and 2 mM). After 30 min  
333 incubation, an aliquot was withdrawn, and enzyme activity was assayed as described  
334 above. Reactivation of SNAP-treated CrGSNOR1 was carried out after 20 min incubation  
335 in the presence of 10 mM DTT.

336

### 337 **Biotin Switch Technique**

338 Purified CrGSNOR1 was incubated in TEN buffer (30 mM Tris-HCl pH 7.9, EDTA 1 mM,  
339 NaCl 100 mM) in the presence of 2 mM GSNO or 2 mM SNAP for 30 minutes in the dark  
340 at 25 °C. The extent of protein nitrosylation was assessed by following the procedure  
341 described in (Zaffagnini et al., 2013). After nitrosylation treatments, proteins (~1 mg ml<sup>-1</sup>)  
342 were precipitated with two volumes of 80% cold acetone at -20 °C during 20 min and  
343 pelleted by centrifugation at 4 °C for 10 min at 15,000 g. The pellet was resuspended in  
344 TENS buffer (30 mM Tris-HCl pH 7.9, 1 mM EDTA, 100 mM NaCl and 1% SDS)  
345 supplemented with a cocktail of alkylating reagents (10 mM iodoacetamide, 10 mM N-  
346 ethylmaleimide), to allow blocking of free thiols. After 30 min incubation at 25 °C under  
347 shaking, the samples were acetone precipitated, as described above, to remove unreacted  
348 alkylating reagents. After resuspension in TENS buffer, proteins were incubated in the  
349 presence of 40 mM ascorbate and 1 mM N-[6-(Biotinamido)hexyl]-3'-(2'-  
350 pyridyldithio)propionamide (HPDP-biotin) for 30 min. This step allows reduction of S-  
351 nitrosylated cysteines and their derivatization with biotin. Proteins were then acetone  
352 precipitated to remove unreacted labelling compounds, pelleted by centrifugation as above  
353 and resuspended in TENS buffer. All steps were performed in the dark. After the final  
354 precipitation, proteins were quantified using the bicinchoninic acid assay, separated by  
355 non-reducing SDS-PAGE and transferred onto nitrocellulose membranes. Protein loading  
356 and transfer were assessed by Ponceau staining of the membrane. Proteins were then  
357 analyzed by western blotting using a primary anti-biotin antibody (1:5,000 dilution; Sigma-  
358 Aldrich) and an anti-mouse secondary antibody coupled to peroxidase (1:10,000 dilution;  
359 Sigma-Aldrich). Signals were visualized by enhanced chemiluminescence as described

360 previously (Zaffagnini et al., 2012). All BST assays included a negative control where  
361 ascorbate was omitted to prevent reduction of S-nitrosothiols and subsequent biotinylation.

362

### 363 **Quaternary structure determination**

364 Gel filtration analysis was performed on a Superdex 200 HR10/300 GL column (GE  
365 Healthcare) connected to an ÄKTA Purifier system (GE Healthcare), previously calibrated  
366 with standard proteins, namely ferritin (440 kDa), aldolase (158 kDa), ovalbumin (43 kDa),  
367 and chymotrypsinogen A (25 kDa), as described in (Pasquini et al., 2017). The column  
368 was equilibrated with 50 mM Tris-HCl, pH 7.5 and 150 mM KCl. The loading volume of  
369 CrGSNOR1 samples was 0.25 ml at a concentration above 1 mg ml<sup>-1</sup> and fractions of 0.5  
370 ml were collected at a flow rate of 0.5 ml min<sup>-1</sup>. DLS measurements were performed  
371 employing a Malvern Nano ZS instrument equipped with a 633 nm laser diode (Zaffagnini  
372 et al., 2019). Samples consisting of CrGSNOR1 (5-50 µM) in 30 mM Tris-HCl, pH 7.9 were  
373 introduced in disposable polystyrene cuvettes (100 µl) of 1 cm optical path length. The  
374 width of DLS hydrodynamic radius distribution is indicated by the polydispersion index. In  
375 the case of a monomodal distribution (Gaussian) calculated by means of cumulant  
376 analysis,  $Pdl = (\sigma/Z_{avg})^2$ , where  $\sigma$  is the width of the distribution and  $Z_{avg}$  is the average  
377 radius of the protein population. The reported hydrodynamic radii ( $R_h$ ) have been averaged  
378 from the values obtained from five measurements, each one being composed of ten runs  
379 of 10 seconds.

380

### 381 **Crystallization and Data Collection**

382 The apo- and holo-forms of CrGSNOR1 were crystallized using the hanging drop vapor  
383 diffusion method at 20 °C. The drop was obtained by mixing 2 µl of 5 mg ml<sup>-1</sup> protein  
384 solution in 30 mM Tris-HCl, pH 7.9, 1 mM EDTA and only for the holo-enzyme 1 mM  
385 NAD<sup>+</sup>, and an equal volume of a reservoir solution containing 0.1 M Tris-HCl pH 8.5, 0.1 M  
386 MgCl<sub>2</sub> or Mg(CH<sub>3</sub>CO<sub>2</sub>)<sub>2</sub>, and 12-15% w/v PEG 20K or 12% w/v PEG 8K as precipitant.  
387 Crystals with a rod-like morphology appeared after about 10 days. The crystals were  
388 fished, briefly soaked in a cryo-solution containing the reservoir components plus 20% v/v  
389 PEG 400, and then frozen in liquid nitrogen. Diffraction data were collected at 100 K using  
390 the synchrotron radiation of the beamline ID23-1 at ESRF (Grenoble, France) for apo-  
391 CrGSNOR1 and of the XRD1 beamline at Elettra (Trieste, Italy) for NAD<sup>+</sup>-CrGSNOR1.  
392 Data collections were performed with a wavelength of 1.0 Å for both crystals, an oscillation

393 angle ( $\Delta\phi$ ) of  $0.1^\circ$  and a sample-to-detector distance ( $d$ ) of 385.62 mm (Pilatus 6M) for the  
394 apo-enzyme, while  $\Delta\phi=0.3^\circ$  and  $d = 260.00$  mm (Pilatus 2M) for the  $\text{NAD}^+$ -enzyme. The  
395 images were indexed with XDS (Kabsch, 2010) and scaled with AIMLESS (Evans and  
396 Murshudov, 2013) from the CCP4 package. The unit cell parameters and the data  
397 collection statistics are reported in Supplemental Table 1.

398

### 399 **Structure Solution and Refinement**

400 Apo-CrGSNOR1 structure was solved by molecular replacement with the program  
401 MOLREP (Vagin and Teplyakov, 2010) using the coordinates of apo-GSNOR from tomato  
402 as search model (PDB code 4DLA; (Kubienova et al., 2013)). Three dimers were placed in  
403 the asymmetric unit consistently with the calculated Matthews coefficient (Matthews, 1968)  
404 equal to  $2.4 \text{ \AA}^3 \text{ Da}^{-1}$  for six molecules in the asymmetric unit and corresponding to a  
405 solvent content of 48%. The refinement was performed with REFMAC 5.8.0135  
406 (Murshudov et al., 2011) selecting 5% of reflections for  $R_{\text{free}}$ , and the manual rebuilding  
407 with Coot (Emsley and Cowtan, 2004). Water molecules were automatically added and,  
408 after a visual inspection, confirmed in the model only if contoured at  $1.0 \sigma$  on the  $(2F_o - F_c)$   
409 electron density map and they fell into an appropriate hydrogen-bonding environment.  
410 Several PEG molecules, chloride and magnesium ions coming from the crystallization  
411 solution were identified and added to the model. The last refinement cycle was performed  
412 with PHENIX (Adams et al., 2010).

413 Since the  $\text{NAD}^+$ -CrGSNOR1 crystal was isomorphous with the apo-form, the final  
414 coordinates of apo-CrGSNOR1 were directly used for refinement providing  $R$  and  $R_{\text{free}}$   
415 values of 0.23 and 0.28, respectively. The calculated  $2F_o - F_c$  and  $F_o - F_c$  electron density  
416 maps revealed a clear density for  $\text{NAD}^+$  in each monomer that was added to the structural  
417 model. The refinement of the holo-structure was performed as described for the apo-form.  
418 Refinement statistics are reported in Supplemental Table 1. The stereo-chemical quality of  
419 the models was checked with Molprobity (Chen et al., 2010). Molecular graphics images  
420 were generated using PyMOL (The PyMOL Molecular Graphics System, Schrödinger,  
421 LLC) and Ligplot (Wallace et al., 1995).

422

### 423 **Secondary structure analysis**

424 The secondary structure of apo-CrGSNOR1 was investigated by means of circular  
425 dichroism (CD) spectroscopy. Samples of apo-CrGSNOR1 (10.7  $\mu\text{M}$ ) were prepared in 30  
426 mM Tris-HCl, pH 7.9 and quantified by spectrophotometric analysis at 280 nm in a 1 cm  
427 cell (Pace et al., 1995). Oxidized apo-CrGSNOR1 was obtained by treatment with 1 mM  
428  $\text{H}_2\text{O}_2$ . Far-UV CD spectra (260–190 nm) were measured at room temperature on a J-810  
429 spectropolarimeter (Jasco, Japan), using a QS-quartz cylindrical cell with 0.2 mm optical  
430 pathlength (Hellma Analytics, Germany), a 1 nm spectral bandwidth, a 20 nm/min  
431 scanning speed, a 4 s data integration time, a 0.2 nm data interval and an accumulation  
432 cycle of 3 scans. The resulting CD spectra were blank-corrected and converted to molar  
433 units per residue ( $\Delta\epsilon_{\text{res}}$ , in  $\text{M}^{-1} \text{cm}^{-1}$ ). The estimation of the secondary structure from the  
434 CD spectra of apo-CrGSNOR1 was performed using the CONTIN-LL algorithm (van  
435 Stokkum et al., 1990) and the 48-protein reference set 7 (Sreerama and Woody, 2000)  
436 available on the DichroWeb web server (<http://dichroweb.cryst.bbk.ac.uk/>) (Whitmore and  
437 Wallace, 2004).

438

#### 439 **Accession numbers**

440 Atomic coordinates and structure factors have been deposited in the Protein Data Bank  
441 ([www.wwpdb.org](http://www.wwpdb.org)) under PDB ID codes XXXX and XXXX for apo and  $\text{NAD}^+$ -CrGSNOR1,  
442 respectively.

443

444

445

## 446 RESULTS

447

### 448 **Distinct NADPH- and NADH-dependent enzymatic systems catalyze GSNO reduction** 449 **in *C. reinhardtii***

450 To determine whether *C. reinhardtii* contains enzymatic systems able to catabolize GSNO,  
451 we examined GSNO reduction in the presence of NADPH or NADH by monitoring the  
452 decrease in absorbance at 340 nm. Chlamydomonas protein extracts were found to  
453 catalyze GSNO reduction using both cofactors and the relative activities correlated with  
454 protein content (Figure 1A and 1B). The NADPH-dependent specific activity ( $75.9 \pm 10.0$   
455  $\text{nmol min}^{-1} \text{mg}^{-1}$ ) was around two-fold higher compared to that measured in the presence  
456 of NADH ( $32.9 \pm 2.3 \text{ nmol min}^{-1} \text{mg}^{-1}$ ). To investigate whether the NADPH- and NADH-  
457 dependent activities are due to different enzymatic systems, we sought to find conditions  
458 that allowed uncoupling them. We first compared the thermal stability of the two enzymatic  
459 activities as it is well established that enzymes can exhibit very different sensitivity to  
460 temperature (Bischof and He, 2005). After incubation of protein extracts at varying  
461 temperatures ranging from 25 °C to 80 °C, we measured GSNO degradation in the  
462 presence of both cofactors. The NADPH-dependent activity was resistant to temperature  
463 up to 70 °C and strong inactivation was only achieved at 80 °C (Figure 1C). By contrast,  
464 NADH-dependent GSNO degradation exhibited a much higher sensitivity to heating,  
465 retaining 85%, 20% and 5% residual activity at 50 °C, 60 °C and 70 °C, respectively  
466 (Figure 1D).

467 Further analyses were conducted aimed at investigating the response of NAD(P)H-  
468 dependent GSNO degrading activities to thiol-modifying agents such as N-ethylmaleimide  
469 (NEM) and methyl methanethiosulfonate (MMTS). These two compounds share a strong  
470 reactivity towards cysteine residues, but while NEM induces irreversible alkylation, MMTS  
471 reacts with sulfhydryl groups (-SH) forming a mixed disulfide (-S-S-CH<sub>3</sub>, dithiomethane). In  
472 addition, NEM exclusively reacts with accessible cysteine residues while MMTS can also  
473 react with metal-coordinating cysteine thiols (D'Ordine et al., 2012). The exposure of  
474 protein extracts to NEM led to a strong and rapid inactivation of the NADPH-dependent  
475 activity whereas no effect was observed when we assayed GSNO reduction in the  
476 presence of NADH (Figure 1E and 1F). By contrast, MMTS had no significant effect on the  
477 NADPH-dependent activity whereas it induced a partial decrease of NADH-dependent  
478 activity, retaining ~60% residual activity after 30 min incubation (Figure 1E and 1F).



479 Based on these findings, we can sustain that Chlamydomonas protein extracts contain at  
480 least two distinct GSNO-reducing enzymatic systems exhibiting specific cofactor  
481 dependence and different sensitivities to thermal denaturation and cysteine-modifying  
482 molecules.

483

#### 484 **The Chlamydomonas genome contains two genes encoding nearly identical GSNOR** 485 **isoforms**

486 Since plant and non-plant GSNORs are known to specifically use NADH as electron  
487 donor, we sought to establish that the algal enzymatic system catalyzing NADH-dependent  
488 GSNO degradation could be ascribed to a GSNOR ortholog. Blast searches using GSNOR  
489 sequences from diverse sources revealed the presence of two *GSNOR* genes in the  
490 Chlamydomonas nuclear genome (v5.5). The two genes were annotated as formaldehyde  
491 dehydrogenases and we name them here *GSNOR1* (*Cre12.g543400*) and *GSNOR2*  
492 (*Cre12.g543350*). The two genes are most probably the result of a recent duplication, as  
493 they are adjacent and code for almost identical proteins (~99% sequence identity,  
494 Supplemental Figure 1). Multiple sequence alignments revealed that Chlamydomonas  
495 GSNORs (CrGSNORs) show 70% and 65% sequence identity with structurally solved  
496 GSNORs from land plants (*i.e.* *Arabidopsis thaliana* and *Solanum lycopersicum*) and  
497 human cells, respectively (Figure 2). Comparison of CrGSNOR sequences with GSNORs  
498 from different plant and non-plant species showed a similar amino acid conservation  
499 ranging from 54% to 72% sequence identity apart from GSNOR from the green alga  
500 *Volvox carteri* (90% identity) (Supplemental Figure 2). The residues involved in the  
501 coordination of both catalytic and structural zinc ions are fully conserved, and this also  
502 applies to residues participating in the stabilization of the cofactor NAD(H) (Figure 2).  
503 Based on the high sequence identity among analyzed GSNORs, we can hypothesize that  
504 algal GSNORs represent the enzymes responsible for the NADH-dependent GSNO  
505 reduction detected in Chlamydomonas protein extracts. To confirm this hypothesis, we  
506 investigated the structural and functional properties of CrGSNORs by focusing our  
507 attention on isoform 1 (CrGSNOR1).

508

#### 509 **CrGSNOR1 is a homodimeric protein displaying a conserved folding**

510 To gain insight into the structural features of CrGSNOR1, we heterologously expressed  
511 the enzyme in *E. coli* as a 386 amino acids polypeptide (full-length protein plus the

512 MHHHHHHH peptide at the N-terminus) and purified it to homogeneity by Ni<sup>2+</sup> affinity  
513 chromatography. The purified protein migrated as a single band of ~40 kDa on SDS-PAGE  
514 under both reducing and non-reducing conditions (Supplemental Figure 3A), and MALDI-  
515 TOF mass spectrometry confirmed that recombinant CrGSNOR1 had the expected  
516 molecular mass of 41500.6 Da (Supplemental Figure 3B). Gel filtration and DLS analyses  
517 were conducted to determine the oligomerization state of CrGSNOR1. The enzyme eluted  
518 as a single symmetric peak with an apparent molecular mass of 96.4 ± 6.1 kDa and the  
519 elution profile at 280 nm perfectly correlated with GSNOR activity (Supplemental Figure  
520 3C). These results clearly indicate that CrGSNOR1 protein is a non-covalent homodimer  
521 as further confirmed by DLS analysis that reported a hydrodynamic radius of 4.14 ± 0.2  
522 nm, corresponding to an apparent molecular mass of 93.6 ± 4.3 kDa.

523 The dimeric fold was chiefly established by solving the crystal structure of CrGSNOR1  
524 under both apo- and holo-form (NAD<sup>+</sup>-CrGSNOR1) at a resolution of 1.8 and 2.3 Å,  
525 respectively (Figure 3A and 3B). The apo- and holo-enzymes showed an identical  
526 crystalline packing with three dimers in the asymmetric unit and a similar overall structure  
527 with root mean square deviation (rmsd) values ranging from 0.20 to 0.86 Å and from 0.33  
528 to 0.97 Å for monomers and dimers superimposition, respectively. Since similar rmsd  
529 values were obtained in the superimposition among the six monomers or three dimers of  
530 the same apo- or holo-form, we can conclude that the observed differences are mainly  
531 related to a conformational intrinsic variability of CrGSNOR1 molecules rather than to  
532 specific conformational changes between apo- and holo-structure. The comparison of  
533 CrGSNOR1 with other structurally known GSNORs (*i.e.* human, tomato and Arabidopsis  
534 GSNORs) clearly indicates a folding conservation with an almost identical secondary  
535 structure composition (Figure 2) (Sanghani et al., 2006; Kubienova et al., 2013; Xu et al.,  
536 2013). The mean rmsd values for dimers superimposition of apo-CrGSNOR1 with tomato  
537 apo-enzyme (PDB code 4DLA) is 0.83 Å and similar values (0.92 and 1.03 Å) were  
538 obtained when NAD<sup>+</sup>-CrGSNOR1 was superimposed to holo-enzymes from tomato (PDB  
539 code 4DL9) and Arabidopsis (PDB code 4JJI), respectively. The comparison with human  
540 (Hs) apo- and holo-CrGSNOR gave rmsd values within the same range (0.92 and 0.84 Å,  
541 respectively). All GSNOR structures known so far are thus very similar, and the differences  
542 between species are, in terms of rmsd, comparable to the differences among CrGSNOR1  
543 dimers of the same asymmetric unit.

544 The structural homology of CrGSNOR1 with other known GSNORs also embraces subunit  
545 composition. Indeed, each subunit is composed of a large catalytic domain comprising

546 residues 1-177 and 327-377, and a smaller cofactor-binding domain (residues 178-326,  
547 Figure 3B). The latter domain shows the typical Rossman fold formed by a six-stranded  
548 parallel  $\beta$ -sheet sandwiched among six  $\alpha$ -helices and an additional  $\beta$ -strand. This domain  
549 forms the internal dimer interface and is oriented in such a way that the six-stranded  $\beta$ -  
550 sheets of each subunit form a continuous  $\beta$ -sheet (Figure 3A). The cofactor is stabilized by  
551 several hydrogen bonds with protein residues and water molecules, and a unique  
552 electrostatic interaction established between its nicotinamide phosphate group and Arg373  
553 (Figure 3C). The adenine ring is sandwiched between two isoleucine residues (Ile228 and  
554 Ile272) but does not form short interactions ( $< 3.5 \text{ \AA}$ ) with protein residues (Figure 3C and  
555 Supplemental Figure 4A). The nicotinamide ring is kept in place by hydrophobic  
556 interactions with two valines (Val207 and Val298) and the methyl group of Thr182, and  
557 hydrogen bonds between its terminal amide group and the backbone carbonyl group of  
558 Val296 and Thr321, and amino group of Phe323 (Figure 3C and Supplemental Figure 4A).

559

### 560 **The catalytic domain of CrGSNOR1 allocates both the catalytic and structural zinc** 561 **ions**

562 The catalytic domain of CrGSNOR1 contains two zinc ions. One zinc ion (Zn402) is  
563 thought to have a structural role and it is coordinated with a tetrahedral geometry by four  
564 cysteine residues (Cys100, 103, 106 and 114) in both apo- and holo-forms (Figure 4A).  
565 The second zinc ion (Zn401) lies in the active site and has a catalytic role as a Lewis acid,  
566 activating the functional group of the substrate. In NAD<sup>+</sup>-CrGSNOR1, it is coordinated with  
567 a tetrahedral geometry involving Cys48, Cys178, His70, and Glu71 (Figure 4B). The  
568 identical geometry is maintained in one out of six subunits of the apo-structure (subunit F)  
569 with Glu71 replaced by a water molecule (or a hydroxide ion) (Figure 4C). In the other  
570 subunits, the metal ion is coordinated by five ligands comprising the four aforementioned  
571 residues and one water molecule in chains A, B, D and E (Figure 4D) or Cys48, Cys178,  
572 His70 and two water molecules in chain C (Figure 4E). This penta-coordination formed a  
573 distorted trigonal bipyramidal geometry with the oxygen ligands from Glu71 and/or water  
574 molecules in the axial positions (*i.e.* perpendicular to the equatorial plane), while the  
575 nitrogen from His70 and the two sulfur ligands from Cys48 and Cys178 are found on the  
576 equatorial plane forming 120° angles. In both subunits F and C, the metal center lies at  
577 more than 4 Å from Glu71 having its carboxylic group electrostatically interacting with  
578 Arg373 (Figure 4C and 4E). This Glu-Arg salt-bridge is conserved also in the subunits  
579 where Glu71 participates in Zn<sup>2+</sup> coordination (Figure 4B and 4D). When the cofactor

580 binds to the enzyme, Arg373 slightly moves toward the cofactor phosphate groups  
581 weakening the interaction with Glu71 that preferentially coordinates the zinc ion (Figure  
582 4B). However, in two subunits of the NAD<sup>+</sup>-structure (C and F subunits) the distance  
583 Glu71-Zn401 is between 3.5-3.8 Å. Subunits superimposition shows that the increased  
584 Glu71-Zn401 distance observed in C and F subunits of both apo- and holo-forms is due to  
585 a 2-3 Å displacement of the zinc ion away from the glutamate toward the substrate-binding  
586 site (Supplemental Figure 5A and 5B) in a position superimposable to the catalytic zinc ion  
587 in HsGSNOR complexed with NADH and S-(hydroxymethyl)glutathione (HMGS)H  
588 (Sanghani et al., 2002) (Supplemental Figure 5C). The reversible association of the  
589 catalytic zinc ion to Glu71 (*i.e.* far in apo-structure, close in holo-structure and far again in  
590 ternary complex-structure), was reported for tomato and human GSNOR (Sanghani et al.,  
591 2002; Kubienova et al., 2013), but its function in the catalytic cycle is still an open issue.  
592 This alternate zinc ion positioning is not observed in the four subunits of apo-CrGSNOR1  
593 structure (A, B, D and E) where Glu71 participates in metal coordination (Supplemental  
594 Figure 5D) and two subunits of the NAD<sup>+</sup>-CrGSNOR1 structure (C and F) where Glu71 is  
595 at a significantly higher distance than the other ligands (Supplemental Figure 5B).  
596 Interestingly, in four out of six subunits of the holo-form (A, C, E, and F) no water molecule  
597 was observed in close proximity to the catalytic zinc ion as found in other GSNOR  
598 structures. By contrast, in B and D subunits a water molecule is located at about 3 Å from  
599 the zinc ion at the opposite side with respect to Glu71 (Figure 4F). In the apo-structure,  
600 this water molecule always participates in metal coordination being hydrogen-bonded to  
601 Thr50 and Tyr96 (distance ranging from 4.2 to 5.8 Å; Supplemental Figure 6A). In all  
602 subunits of NAD<sup>+</sup>-CrGSNOR1 structure, the hydroxyl group of Tyr96 is rotated compared  
603 to the apo-form (Supplemental Figure 6B) and is not able to interact with the water  
604 molecule that partially loses its stabilization. Differently, Arabidopsis, tomato and human  
605 holo-structures always show a water molecule in the proximity of the catalytic zinc ion and  
606 the rotation of the conserved Tyr96 is not observed. When present, the water molecule  
607 bridges the zinc ion and the nicotinamide ring of the cofactor, which lies at about 5.0 Å  
608 from the catalytic metal (Figure 4F).

609 The active site is located between the catalytic and cofactor-binding domains (Figure 3B)  
610 and is formed by several loops including Gly56-Glu61, Pro109-Val117, Ile93-Gln97,  
611 Phe144-Thr147, Ala286-Trp290 and Ile295-Gln303, and the  $\alpha$ -helix Arg118-Lys123  
612 (Figure 2). These portions contain residues involved in the binding of the substrate  
613 HMGS)H in HsGSNOR (Engeland et al., 1993; Estonius et al., 1994; Sanghani et al.,

614 2002). Most of these residues are conserved among different GSNORs (Figure 2), except  
615 for Gln112, Tyr140, and Lys284 (HsGSNOR numbering), which are replaced in  
616 CrGSNOR1 by Val115, Phe144, and Arg288, respectively (Figure 2). Within the substrate-  
617 binding site of NAD<sup>+</sup>-CrGSNOR1 structure (chains A-F), we observed a PEG molecule  
618 from the crystallization medium that had a different length in the diverse chains. The  
619 terminal hydroxyl group of PEG is located at more than 5.5 Å from the catalytic zinc ion  
620 and does not contribute to its coordination as observed for the hydroxyl group of HMGS  
621 in HsGSNOR ternary complex (Sanghani et al., 2002). Hydrogen bonds with Tyr96, Gln97,  
622 NAD<sup>+</sup>, and several water molecules stabilize PEG (Supplemental Figure 4B). The rotation  
623 of Tyr96 side chain with respect to the position in the apo-structure is required for PEG  
624 accommodation into the substrate-binding site. An equivalent rotation is not observed in  
625 the HMGS binding to HsGSNOR.

626

### 627 **Biochemical features of recombinant CrGSNOR1**

628 Purified recombinant CrGSNOR1 was assayed for its ability to catabolize GSNO. The  
629 enzyme-catalyzed GSNO degradation in the presence of NADH displaying a linear  
630 relationship with protein concentrations (Supplemental Figure 7). By contrast, its activity  
631 was almost undetectable when NADPH replaced NADH (Figure 5A). Likewise, no activity  
632 was observed by replacing GSNO with GSSG (Figure 5B). These results indicate that  
633 CrGSNOR1 activity strictly depends on NADH and GSNO. GSNOR from diverse sources  
634 was originally found to catalyze the oxidation of S-(hydroxymethyl)glutathione (HMGS) in  
635 the presence of NAD<sup>+</sup> (Holmquist and Vallee, 1991; Liu et al., 2001; Sanghani et al., 2002;  
636 Kubienova et al., 2013; Matamoros et al., 2020). The Chlamydomonas GSNOR1 enzyme  
637 was also able to catalyze the NAD-dependent oxidation of HMGS but with a 2.5-fold  
638 lower efficiency compared to the GSNO degrading activity (Figure 5C).

639 Kinetic analyses were performed on the NADH-dependent GSNO reducing activity of  
640 CrGSNOR1 using either GSNO or NADH as variable substrates and the kinetic  
641 parameters were determined by non-linear regression analysis (Supplemental Figure 8A  
642 and 8B). When the initial rates were plotted as a function of substrate concentration,  
643 responses were hyperbolic allowing apparent kinetic parameters to be calculated. The  
644 apparent Michaelis-Menten constants ( $K'_m$ ) measured at saturating concentrations of the  
645 non-varied substrate were  $24.9 \pm 1.5 \mu\text{M}$  for GSNO and  $14.3 \pm 2.1 \mu\text{M}$  for NADH and the  
646 apparent turnover numbers ( $k'_{cat}$ ) were  $26.6 \pm 2.5 \text{ sec}^{-1}$  (GSNO) and  $27.0 \pm 0.6 \text{ sec}^{-1}$

647 (NADH). The calculated catalytic efficiencies ( $k'_{cat}/K'_m$ ) of the reaction were  $\sim 1.07 \times 10^6$   
648  $M^{-1} s^{-1}$  (GSNO) and  $\sim 1.86 \times 10^6 M^{-1} s^{-1}$  (NADH). These values are comparable to  
649 previously characterized plant GSNORs although kinetic properties slightly differ for  
650 CrGSNOR1 with a  $\sim 2$ – $3$ -fold higher substrate/cofactor affinities and  $\sim 4$ – $5$ -fold lower  
651 turnover numbers (Kubienova et al., 2013; Guerra et al., 2016; Ticha et al., 2017;  
652 Matamoros et al., 2020).

653 After establishing the biochemical properties of recombinant CrGSNOR1, we analyzed its  
654 sensitivity to thermal denaturation as carried out with *Chlamydomonas* protein extracts.  
655 The thermal stability of recombinant CrGSNOR1 was investigated by following the residual  
656 GSNOR activity after 30 min incubation at different temperatures (Figure 5D). The enzyme  
657 showed a relatively high degree of thermostability, retaining maximal activity in the 25-  
658 50 °C range. Exposure to higher temperatures led to a rapid protein inactivation being  
659 complete at temperatures above 65 °C. These observations correlate with the thermal  
660 sensitivity of the NADH-dependent activity measured in algal protein extracts (Figure 1d).  
661  $T_{50}$ , the temperature at which 50% of the activity is retained after 30 min incubation, was  
662 found to be  $\sim 56$  °C, a value strikingly similar to other plant GSNORs (Kubienova et al.,  
663 2013; Ticha et al., 2017). The effect of temperature on CrGSNOR1 stability was also  
664 evaluated by following the turbidity at 405 nm, which represents an optical measurement  
665 for protein denaturation/aggregation (Supplemental Figure 8C). Consistent with activity  
666 measurements, CrGSNOR1 remained fully stable when incubated at 25 °C, whereas it  
667 started to aggregate immediately after incubation at 75 °C, reaching maximal turbidity after  
668 10 min. At 55 °C, the aggregation kinetic proceeded more slowly and half-maximal  
669 turbidity was reached after 30 min.

670 To further extend the comparison between the recombinant protein and the NADH-  
671 dependent enzymatic system from algal protein extracts, we examined the sensitivity of  
672 CrGSNOR1 to MMTS and NEM. Exposure of CrGSNOR1 to MMTS resulted in a complete  
673 inactivation of the enzyme, while NEM did not affect catalysis (Figure 5E). This  
674 observation is in agreement with the catalytic effect of these two thiol-modifying  
675 compounds on algal protein extracts where NADH-dependent activity was only affected in  
676 the presence of MMTS (Figure 1F). In protein extracts, however, the MMTS-dependent  
677 inactivation was only partial and this might be due to its reaction with thiol-containing  
678 proteins other than GSNORs. These results also indicate that CrGSNOR1 activity has a  
679 dissimilar response to MMTS and NEM, likely residing on the reactivity of MMTS with both

680 solvent accessible and zinc-coordinating cysteines (D'Ordine et al., 2012) thus affecting  
681 protein catalysis and/or structural stability.

682

### 683 **Cysteine conservation and thiol reactivity in CrGSNOR1**

684 CrGSNOR1 is a cysteine-rich enzyme as it contains sixteen cysteines that correspond to  
685 4.2% of the total amino acid content (Supplemental Figure 1). Among GSNORs from  
686 different species, nine out of sixteen cysteines are fully conserved comprising  
687 Cys48/Cys178 (coordination of the catalytic zinc atom), Cys100/Cys103/Cys106/Cys114  
688 (coordination of the structural zinc atom) and Cys11 (except in bacterial GSNORs),  
689 Cys174 (except in *C. elegans*) and Cys272 (Figure 2 and Supplemental Figure 2). The  
690 remaining seven Cys are randomly conserved with Cys95/Cys285/Cys371/Cys374 only  
691 present in the green lineage with the exceptions of Cys95 absent in pea GSNOR, Cys374  
692 absent in the tomato and *Lotus japonicus* GSNOR1, and Cys285/Cys371 present in  
693 *Synechocystis*/yeast GSNOR, respectively. Cys244 is conserved in algae and most  
694 animals and bacteria (Figure 2 and Supplemental Figure 2). Despite the high Cys content,  
695 we found that CrGSNOR1 only contains two solvent accessible/reactive cysteine thiols as  
696 assessed by DTNB-based thiol titration ( $2.0 \pm 0.3$  free thiols per subunit).

697 In order to confirm the number of accessible/reactive free thiols and establish their  
698 position, we analyzed the protein by matrix-assisted laser desorption ionization time-of-  
699 flight mass spectrometry (MALDI-TOF MS) following alkylation treatment in the presence  
700 of maleimide derivatives. Preliminary NEM-based alkylation experiments suggested that  
701 CrGSNOR1 was mainly di-alkylated (Supplemental Figure 9). Nevertheless, the low mass  
702 shift induced by NEM (+125 Da per alkylated cysteine) precluded a clear separation of the  
703 different alkylated forms of CrGSNOR1 at the protein level. Therefore, NEM was replaced  
704 by Biotin-maleimide as it exhibits the same maleimide reactive group but allows better  
705 separation of the different protein species by generating a +451 Da mass shift per  
706 alkylated cysteine. As shown in Figure 6, CrGSNOR1 underwent a near complete di-  
707 alkylation after 30 min incubation and longer incubation showed no further significant  
708 peaks. These data are consistent with the two accessible/reactive cysteine thiols  
709 determined by DTNB assay. Subsequently, we identified the alkylated cysteines by  
710 peptide mass fingerprinting of CrGSNOR1 treated with Biotin-maleimide for 20 min. This  
711 incubation time was selected to generate partial mono- and di-alkylated species of  
712 CrGSNOR1. By comparing MALDI-TOF spectra obtained after trypsin digestion of

713 untreated or Biotin-maleimide-treated CrGSNOR1, we identified Cys244 and Cys371 as  
714 alkylated residues (Figure 7). Taking advantage of the presence of a biotin moiety, we also  
715 performed an enrichment of alkylated peptides using monomeric avidin as previously  
716 described in (Pérez-Pérez et al., 2017) and we confirmed the alkylation of Cys371  
717 (Supplemental Figure 10) while peptides containing Cys244 were not recovered likely due  
718 to its weak propensity to ionize under MALDI ionization conditions. Altogether, mass  
719 spectrometry analyses are consistent with the structural features of CrGSNOR1. Alkylation  
720 of Cys371 agrees with the high accessible surface area (ASA) calculated from the  
721 structure, ranging from 14 Å<sup>2</sup> to 31 Å<sup>2</sup> in different chains of the asymmetric unit. Similarly,  
722 Cys244 has an accessibility in the 29-31 Å<sup>2</sup> range, supporting its reactivity towards  
723 maleimide. The structure of the apo-form revealed that Cys272 is also exposed to the  
724 solvent (ASA 16-22 Å<sup>2</sup>) but no alkylation was observed (Supplemental Figure 11). This  
725 lack of reactivity may depend on the orientation of its thiol group toward a hydrophobic  
726 cavity (formed by Val187, 193, 201, 207, 211 and 296, Ala186, Gly208 and Phe270) that  
727 likely hampers reaction with maleimide derivatives. Conversely, the cofactor binding  
728 makes Cys272 completely buried in the holo-form.

729

### 730 **CrGSNOR1 has limited sensitivity to S-nitrosylation and remains unaffected by** 731 **oxidative treatments**

732 Thiol-modifying treatments suggested that CrGSNOR1 contains cysteine(s) that might be  
733 prone to oxidative modifications that may affect enzyme catalysis. To investigate the  
734 sensitivity of CrGSNOR1 to physiological thiol-based modifications, we measured protein  
735 activity upon treatments with different molecules that specifically induce cysteine oxidation.  
736 As shown in Figure 8A, diamide (TMAD) and hydrogen peroxide (H<sub>2</sub>O<sub>2</sub>) did not  
737 significantly alter CrGSNOR1 activity even at a high concentration (1 mM). Moreover,  
738 circular dichroism (CD) spectra of apo-CrGSNOR1 before and after treatment with H<sub>2</sub>O<sub>2</sub>  
739 are substantially superimposable, ruling out a significant variation of secondary structure  
740 upon the oxidative treatment (Supplemental Figure 12 and Supplemental Table 2).  
741 Previous studies reported that plant GSNORs undergo S-nitrosylation with consequent  
742 inhibition of nearly all isoforms with the exception of GSNOR1 and GSNOR2 from *Lotus*  
743 *japonicus* (Frungillo et al., 2014; Cheng et al., 2015; Guerra et al., 2016; Ticha et al., 2017;  
744 Zhan et al., 2018; Chen et al., 2020; Matamoros et al., 2020; Zhang et al., 2020). In order  
745 to examine whether S-nitrosylation can regulate CrGSNOR1, the purified enzyme was  
746 exposed to different types of NO-donors. Nitrosylation reactions were induced chemically



747 with the NO-releasing compound SNAP or with GSNO that acts as a trans-nitrosylating  
748 agent (Askew et al., 1995). In the presence of GSNO, the activity of CrGSNOR1 remained  
749 unaffected (Figure 8B) while we observed a partial and reversible inhibition in the  
750 presence of SNAP (Figure 8B and 8C). To assess the S-nitrosylation status of  
751 CrGSNOR1, we applied the biotin switch technique (BST) on the GSNO- and SNAP-  
752 treated enzyme. Surprisingly, we observed a positive nitrosylation signal following  
753 exposure to both nitrosylating agents (Figure 8D and 8E), indicating that either GSNO or  
754 SNAP can induce cysteine S-nitrosylation but only the latter was found to affect, though  
755 partially, CrGSNOR1 catalysis.

756

757

758

## 759 DISCUSSION

760

761 Over the last decades, NO signaling has emerged as a fundamental process by which  
762 photosynthetic organisms including unicellular algae, regulate different aspects of cell  
763 metabolism (Zaffagnini et al., 2016; Del Castello et al., 2019; Kolbert et al., 2019).  
764 Characterization of the mechanisms regulating NO homeostasis and NO-dependent  
765 signaling pathway, is of striking importance in microalgae considering their  
766 biotechnological potential for the bio-production of drugs, energy and food (Wijffels et al.,  
767 2013; Scaife et al., 2015). Recent efforts have set the foundations for the use of  
768 *Chlamydomonas* and other unicellular phototrophs as molecular chassis exploitable in the  
769 next synthetic biology-driven green revolution (Scaife and Smith, 2016; Crozet et al., 2018;  
770 Vavitsas et al., 2019). NO metabolism is of particular importance in these organisms living  
771 in liquid micro-oxic environments, where the fermentative metabolism and the  
772 Hemoglobin-NO cycle are important players in cellular bioenergy (Hemschemeier et al.,  
773 2013; Becana et al., 2020). In *Chlamydomonas*, the biological function of NO relates to  
774 responses to nitrogen and sulfur starvation, hypoxia/anoxia, high light and light to dark  
775 transitions (Hemschemeier et al., 2013; Wei et al., 2014; Berger et al., 2016; Pokora et al.,  
776 2017; De Mia et al., 2019; Kuo et al., 2020). In general, protein S-nitrosylation acts as the  
777 major mechanism propagating NO-dependent biological signaling and it can modulate  
778 protein function by altering enzymatic activity and/or protein structure (Zaffagnini et al.,  
779 2016; Feng et al., 2019; Stomberski et al., 2019; Zaffagnini et al., 2019). Noteworthy, while  
780 NO-dependent biological pathways have been uncovered, very little is known about how  
781 microalgae control nitrosothiol homeostasis through NO catabolism.

782 Considering the primary role of GSNO as a trans-nitrosylating agent, the redox systems  
783 involved in GSNO catabolism are fundamental to control the intracellular levels of this low-  
784 molecular weight nitrosothiol and consequently, the extent of protein S-nitrosylation. In this  
785 work, we observed that *Chlamydomonas* protein extracts contain two distinct systems  
786 catalyzing GSNO reduction using NADPH or NADH and having different sensitivities to  
787 thiol-modifying compounds and thermal denaturation. Based on cofactor specificity and  
788 biochemical properties, we can hypothesize that the NADPH-dependent activity might  
789 primarily involve thiol-disulfide exchanges mediated by TRX or GRX (Sengupta and  
790 Holmgren, 2012; Ren et al., 2019). Indeed, these enzymes are thermostable and their  
791 activity is inhibited by irreversible alkylation (Lemaire et al., 2000; Marchand et al., 2019).  
792 Similar properties are also found in glutathione reductases but these enzymes cannot use

793 GSNO as a substrate ((Becker et al., 1995) and authors' personal communication). Other  
794 NADPH-dependent GSNO-reducing activities might be involved such as carbonyl  
795 reductase 1 and aldo-keto reductase family 1 member A1 identified in human (Bateman et  
796 al., 2008; Stomberski et al., 2019) and for which orthologs are present in *Chlamydomonas*  
797 genome (data not shown). The NADH dependent activity observed in *Chlamydomonas*  
798 protein extracts is most likely dependent on GSNOR since its sensitivity to thiol modifying  
799 agents and thermal denaturation is comparable to purified *Chlamydomonas* GSNOR1,  
800 which was found to strictly depend on GSNO and NADH (Figure 1 and Figure 5). This is  
801 further supported by an overall conservation of the three-dimensional structure of apo- and  
802 holo-CrGSNOR1 compared to other structurally known GSNORs. Despite this global  
803 structural homology, we observed that the coordination sphere of the catalytic zinc ion  
804 shows a high variability (Figure 4B-F), while the tetrahedral thiolate-geometry ( $S_4$ )  
805 coordination of the structural zinc ion is perfectly conserved (Figure 4A). When  $NAD^+$  is  
806 bound to CrGSNOR1, the zinc atom is mainly coordinated by four conserved residues  
807 (Cys48, His70, Glu71 and Cys178; Figure 2 and Figure 4B) as in human, tomato, and  
808 *Arabidopsis* GSNORs. However, in two out of six subunits, the metal stabilization by Glu71  
809 appears weaker with a distance above 3.5 Å. Indeed carboxylate groups can show a wide  
810 range of metal-ligand distances up to 4.5 Å (Maret and Li, 2009). Differently, in the apo-  
811 structure the catalytic zinc is stabilized by four or five ligands involving Cys48, His70,  
812 Cys178, and Glu71 replaced or accompanied by one or two water molecules (or hydroxide  
813 ions; Figure 4C-F). This expansion to a penta-coordination sphere, already reported for  
814 other zinc-containing proteins (e.g. adenosine deaminase (Wilson and Quijcho, 1993);  
815 astacin (Gomis-Ruth et al., 1993)) or temporarily occurring in catalytic zinc-sites to  
816 accommodate the substrate (Holmes and Matthews, 1981; McCall et al., 2000; Daniel and  
817 Farrell, 2014), was not observed in other structurally known GSNORs. The functional role  
818 of this increased dynamicity of the catalytic zinc in the algal enzyme possibly due to steric  
819 and stabilizing electrostatic interactions from the secondary coordination sphere, remains  
820 to be established.

821 GSNOR is typically defined as a cysteine-rich protein containing 14 to 16 Cys residues  
822 (Figure 2 and Supplemental Figure 2). Consistently, CrGSNOR1 contains 16 Cys of which  
823 only Cys244 and Cys371 were found to be solvent-exposed and reactive towards  
824 maleimide derivatives, although alkylation did not affect activity, in sharp contrast with  
825 AtGSNOR whose activity is strongly inhibited after exposure to alkylating agents (Kovacs  
826 et al., 2016). While CrGSNOR1 is resistant to NEM, MMTS-dependent conjugation causes

827 a rapid inactivation of the enzyme, which is likely ascribed to the ability of MMTS to alter  
828 zinc(s)-coordination with consequent protein inactivation. The response of CrGSNOR1 to  
829 thiol-based modifications reflects dissimilarities with other plant GSNORs (Lindermayr,  
830 2017; Jahnova et al., 2019). Recent studies showed that GSNOR from several land plants  
831 was inhibited by both H<sub>2</sub>O<sub>2</sub>-dependent oxidation and S-nitrosylation (Frungillo et al., 2014;  
832 Cheng et al., 2015; Ticha et al., 2017; Zhan et al., 2018; Zhang et al., 2020). Lindermayr  
833 and colleagues identified the catalytic zinc-coordinating cysteine residues (Cys47 and  
834 Cys177) as primary targets of H<sub>2</sub>O<sub>2</sub>-mediated oxidation in AtGSNOR with consequent zinc  
835 ion release and disruption of the catalytic site (Kovacs et al., 2016). Although these  
836 cysteines are fully conserved in CrGSNOR1, oxidizing compounds such as diamide and  
837 H<sub>2</sub>O<sub>2</sub> did not alter protein activity and folding (Figure 8 and Supplemental Figure 12). This  
838 suggests that CrGSNOR1 does not contain oxidation-prone zinc-binding cysteine(s), likely  
839 due to protection by a highly stable coordination in the algal enzyme. CrGSNOR1 was  
840 found to undergo S-nitrosylation but without any significant effect on enzyme activity  
841 (Figure 8), as previously observed for GSNORs from *Lotus Japonicus* (Matamoros et al.,  
842 2020). By contrast, AtGSNOR was shown to undergo S-nitrosylation on Cys10, Cys271,  
843 and Cys370, leading to inhibition of the enzyme through a 2-fold decrease of both the  
844 affinity towards GSNO and the turnover number (Guerra et al., 2016). These three  
845 residues are fully conserved in CrGSNOR1 (Figure 2 and Figure 9A), but alterations in  
846 cysteine microenvironments and local folding might explain the limited responsiveness of  
847 CrGSNOR1 to S-nitrosylation or other thiol modifications.

848 In CrGSNOR1, Cys11 is barely accessible, as in AtGSNOR, and not reactive toward  
849 alkylating reagents. Structural comparison between the two enzymes unveiled that despite  
850 a generally high backbone similarity, Cys11 in CrGSNOR1 is surrounded by specific  
851 residues (*i.e.* Glu10, Thr29, Asp137, Glu152 and the carboxyl group of C-terminal Phe377)  
852 that determine a negative electrostatic surface potential (Figure 9B). These residues are  
853 not conserved in AtGSNOR1 (Figure 2) where Cys10 is rather surrounded by positive  
854 charges (Figure 9C) due to the N-terminal groups of Ala2, Lys11, Lys40 and Lys379 (the  
855 two latter not conserved in CrGSNOR1, Figure 2). The differences between the  
856 microenvironment of Cys11/Cys10 in the two enzymes could be the basis for the lack of  
857 reactivity of this residue in CrGSNOR1. *In vivo*, nitrosylation of AtGSNOR Cys10 occurs in  
858 response to hypoxia and promotes degradation of the enzyme by selective autophagy  
859 (Zhan et al., 2018). Recently, the non-canonical catalase CAT3 was shown to  
860 transnitrosylate AtGSNOR1 at Cys 10, a process strictly dependent on CAT3 Cys343

861 (Chen et al., 2020). This mechanism is unlikely to occur in *Chlamydomonas* since the  
862 previously cited cysteine is not conserved in the unique algal redox regulated catalase  
863 (Shao et al., 2008; Michelet et al., 2013).

864 As observed for Cys370 in AtGSNOR (Xu et al., 2013), CrGSNOR1 Cys371 is exposed to  
865 the solvent, although its accessibility decreases from the apo- to the holo-form (31-14 Å<sup>2</sup> to  
866 15-5 Å<sup>2</sup>), and undergoes maleimide-dependent alkylation. Nevertheless, Cys371 alkylation  
867 has no effect on CrGSNOR1 activity. In both enzymes, Cys371/Cys370 lies in a loop that  
868 follows helix  $\alpha$ 12 and its thiol group forms various hydrogen bonds with surrounding  
869 residues (Figure 2 and Figure 9D). This region is characterized by high mobility expressed  
870 by backbone thermal parameters (B factors) larger than the average value for the whole  
871 protein (Supplemental Figure 13 and Supplemental Table 1). However, in AtGSNOR, helix  
872  $\alpha$ 12 is 3-4 residues shorter compared to CrGSNOR1 thereby decreasing the structural  
873 constraints due to a rigid secondary structure and increasing the probability that a redox  
874 modification of the cysteine could induce a local conformational rearrangement affecting  
875 the catalytic activity. Indeed, this residue overlooks the cofactor binding pocket and lies at  
876 about 11-12 Å from the catalytic zinc ion (Figure 9D). As observed for Cys371, also  
877 Cys272 (Cys271 in AtGSNOR) is solvent-accessible in CrGSNOR1. However, this residue  
878 becomes completely buried when NAD(H) is bound to the enzyme on the other side of the  
879 cofactor-binding pocket. By comparing the microenvironment of this residue, we observed  
880 that the region surrounding Cys272/Cys271 is structurally conserved between algal and  
881 plant enzymes. However, this residue is not modified by alkylation in CrGSNOR1 and we  
882 can thus suppose that physiological oxidative molecules cannot alter its redox state.

883 The other solvent-exposed cysteine targeted by maleimide alkylation in the  
884 *Chlamydomonas* enzyme, Cys244, is not conserved in GSNORs from land plants while it  
885 is present in other organisms including *V. carteri*, human, mouse, *C. elegans*, and  
886 prokaryotes such as *E. coli* and *Synechocystis sp.* PCC6803 (Figure 2 and Supplemental  
887 Figure 2). CrGSNOR1 Cys244 is hydrogen-bonded to Lys237 (Figure 9E) and the  
888 presence of a positive region determined by Lys237 side chain in close proximity to the  
889 Cys244 thiol group and of a larger negative region due to Asp249 and Glu251, determine  
890 a specific microenvironment that can facilitate a proper binding of oxidative molecules (e.g.  
891 NO or GSNO). Nevertheless, alkylation of this residue did not alter the catalytic functioning  
892 of the enzyme, suggesting that modification of this residue is unlikely to control  
893 CrGSNOR1.

894 Finally, we demonstrated that CrGSNOR1 has a null or limited sensitivity to thiol-based  
895 oxidative modifications compared to Arabidopsis GSNOR (Guerra et al., 2016; Kovacs et  
896 al., 2016) and other homologues from land plants (Ticha et al., 2017) with the notable  
897 exception of *Lotus Japonicus* GSNORs (Matamoros et al., 2020). Deep analyses of the  
898 crystallographic structure of CrGSNOR1 revealed structural features likely responsible for  
899 the difference in Cys reactivity compared to plant enzymes. Indeed, cysteine reactivity  
900 does not reflect the absolute solvent accessibility of the residue and is also influenced by  
901 the cysteine microenvironment or local folding. Specifically, these structural features can  
902 (i) protect the residues from oxidative attacks, (ii) hamper proper allocation of oxidative  
903 compounds, and (iii) limit conformational changes that might directly affect protein  
904 catalysis or favor the redox sensitivity of other cysteine residues. The limited sensitivity of  
905 CrGSNOR1 to redox post-translational modifications suggests that regulation of NO  
906 signaling in algae may operate through other mechanisms including regulation of GSNOR  
907 by other modifications or by regulation of protein abundance and gene expression.  
908 GSNOR may also be constitutively active in algae, regulation of nitrosothiols abundance  
909 being controlled by other NO degrading enzymes or at the level of NO production. These  
910 differences are likely linked to distinct requirements for regulation of NO metabolism  
911 between land plants and algae.

912

913

914 **ACKNOWLEDGMENTS.** We gratefully acknowledge Elettra and the European  
915 Synchrotron Radiation Facility (ESRF) for allocation of beam time. SF and GF S.F. thanks  
916 the Consorzio Interuniversitario di Ricerca in Chimica dei Metalli nei Sistemi Biologici  
917 (CIRCMSB). This work was supported by University of Bologna Alma Idea 2017 Program  
918 (to MZ); CNRS Sorbonne Université, Agence Nationale de la Recherche Grant 17-CE05-  
919 0001 CalvinDesign (to CHM and SDL); LABEX DYNAMO (ANRLABX-011 to CHM, MDM,  
920 and SDL) and EQUIPEX CACSICE (ANR-11-EQPX-0008 to CHM and SDL), partly  
921 through funding of the Proteomic Platform IBPC (PPI). JR is supported by a PhD grant  
922 from the University of Bologna (PhD program in Cellular and Molecular Biology).

923

924

925 **CONFLICT OF INTEREST**

926 We declare no conflict of interest

927

928

929

930

931

932

933

934

935

936

937

938

939

940

941

942

943

944

945

946

947

948

949

950

951

952

953

954

955

956

957

958

959

960

961

962

963

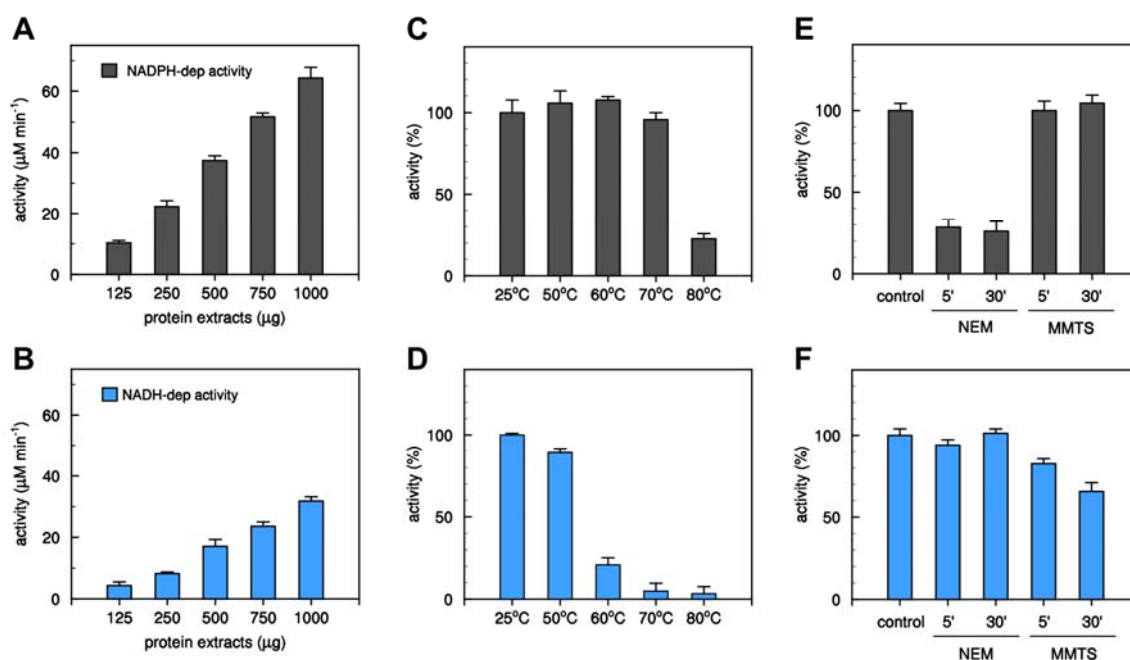

**Figure 1. Measurements of GSNO-reducing activities from *Chlamydomonas* cell extract**

(A) and (B) Determination of GSNO-reducing activity by variable amounts of protein extract from *Chlamydomonas* cell culture in the presence of NAD(P)H (NADPH, black bars; NADH, white bars). Data represented the mean  $\pm$  SD calculated from three biological replicates ( $n = 3$ ). (C) and (D) Thermal sensitivity of NAD(P)H-dependent GSNO reducing activity. Protein extracts (500  $\mu$ g) were exposed to various temperatures and after incubation the NAD(P)H-dependent activities were assayed (NADPH, black bars; NADH, white bars). (E) and (F) Alkylation sensitivity of NAD(P)H-dependent GSNO reducing activity. Protein extracts were exposed for 5 or 30 min to 1 mM alkylating agents (NEM or MMTS) and after incubation the NAD(P)H-dependent activity was assayed (NADPH, black bars; NADH, white bars). For panels C-F, values are expressed as percentage of activity measured under control conditions (see Material and Methods) and are represented as mean percentage  $\pm$  SD of three biological replicates ( $n = 3$ ).



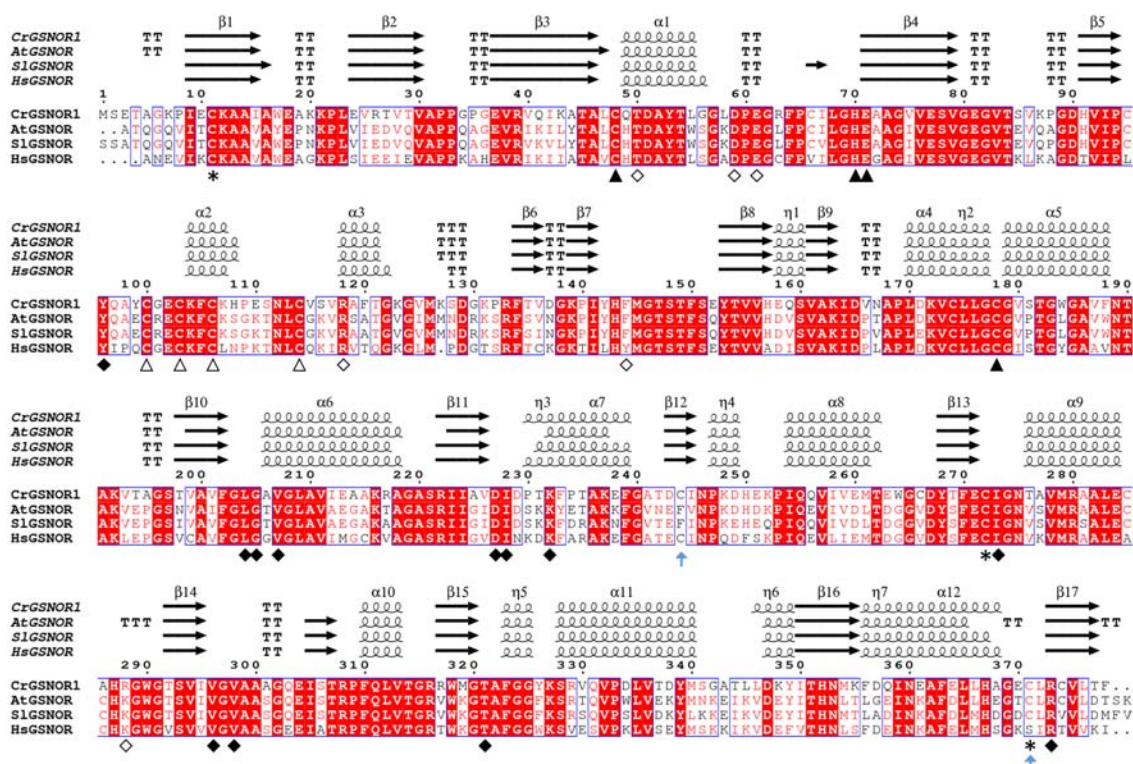

964  
965  
966  
967

**Figure 2. Primary and secondary structure alignment of 3D-solved GSNORs**

968 The alignment was performed with Esript (<http://esript.ibcp.fr>) (Robert and Gouet, 2014)  
969 using the sequence and the structure of CrGSNOR1 (this work); GSNOR from *Arabidopsis*  
970 *thaliana* (AtGSNOR, PDB ID 3UKO); GSNOR from *Solanum lycopersicum* (SIGSNOR,  
971 PDB ID 4DLB), GSNOR from *Homo sapiens* (HsGSNOR, PDB ID 1M6H). The conserved  
972 residues are shown in red background; blue boxes represent conserved amino acid  
973 stretches (>70%). Residues with similar physico-chemical properties are indicated in red.  
974 α-helices, β-strands and 3<sub>10</sub>-helices are marked with α, β, η respectively. β-turns and α-  
975 turns are represented by TT and TTT, respectively. Residues coordinating the catalytic  
976 and structural zinc atom are indicated by closed and open triangles, respectively. Closed  
977 and open diamonds denote residues interacting with the cofactor and substrate,  
978 respectively. An asterisk indicates putative cysteine targets of S-nitrosylation in AtGSNOR  
979 while a light-blue arrow indicates accessible cysteine residues in CrGSNOR1. The primary  
980 sequence alignment was made using Clustal Omega (Sievers et al., 2011).

981



990 Rossman fold. The larger catalytic domain (in blue; residues 1-177 and 327-377)  
991 comprises the metal ion sites. The active site of CrGSNOR1 (zoom) is located between  
992 the catalytic and cofactor-binding domains and is formed by the loops and the  $\alpha$ -helix  
993 highlighted in red. (C) Hydrogen bond and salt-bridge interactions (up to 3.5 Å) of NAD<sup>+</sup>  
994 with protein residues and water molecules.  
995

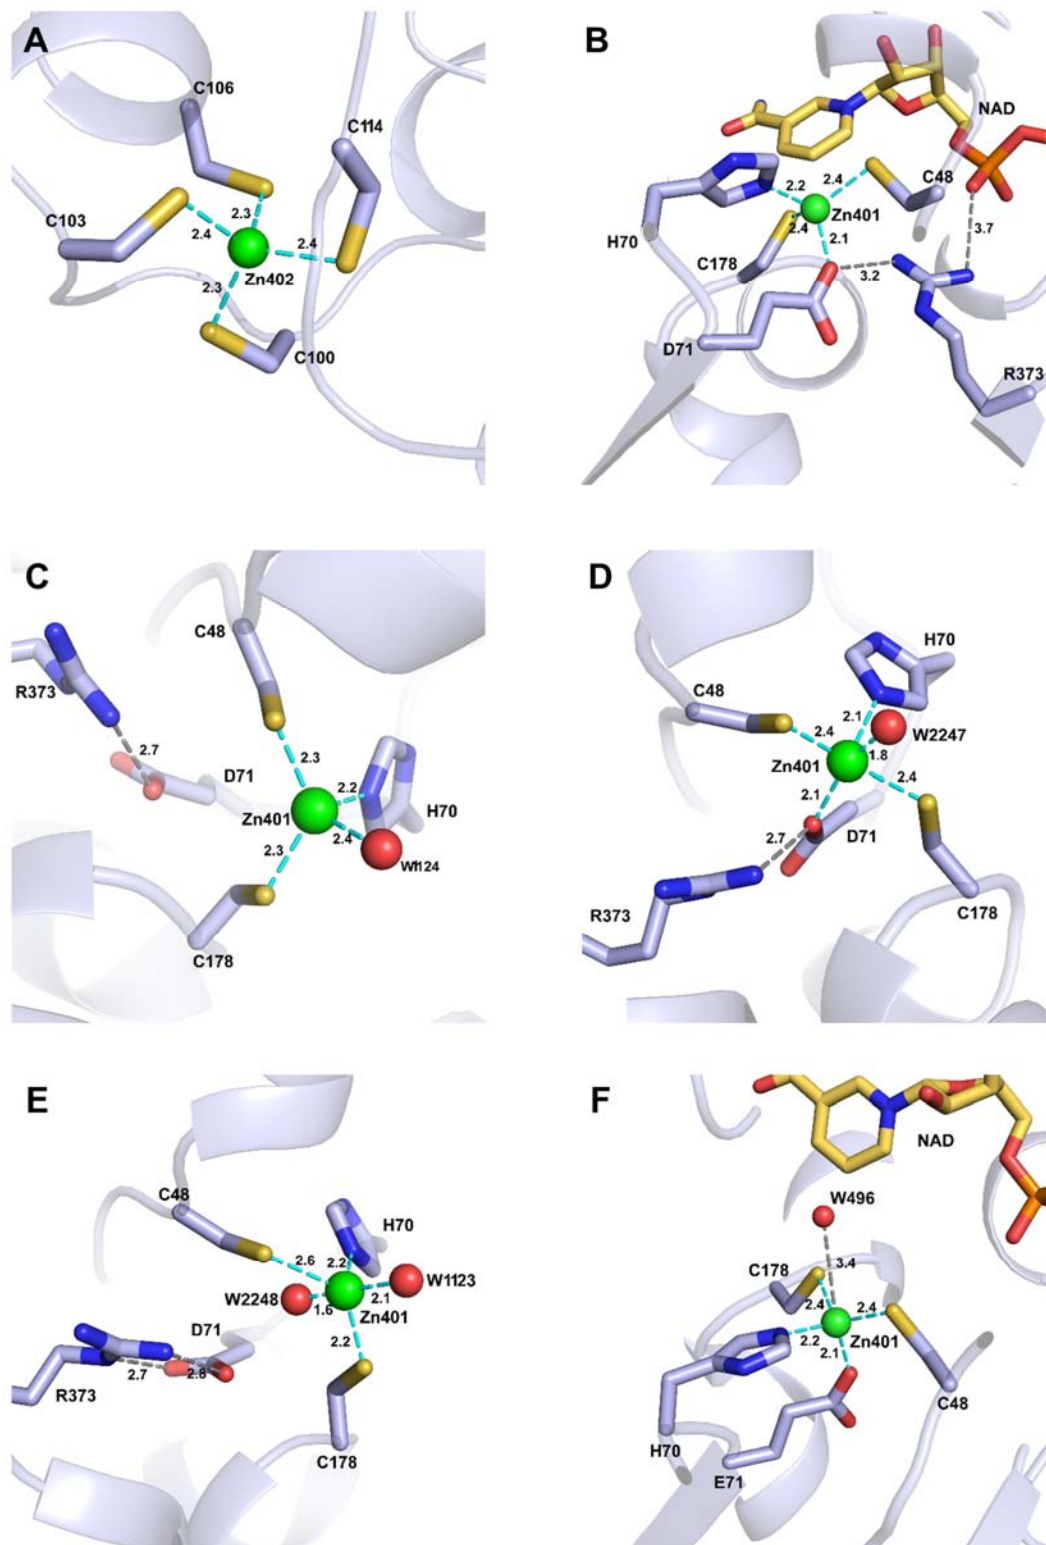

996  
997  
998

**Figure 4. Coordination environment of the zinc ions in apo- and NAD<sup>+</sup>-CrGSNOR1**

999 (A) The structural zinc ion is coordinated by four cysteine residues (100,103, 106 and 114)  
1000 in all subunits of both enzyme forms. (B) The catalytic zinc ion is coordinated with a  
1001 tetrahedral geometry by two cysteines (48 and 178), His70, and Glu71 in all subunits of  
1002 NAD<sup>+</sup>-CrGSNOR1. Glu71 also forms a salt-bridge with Arg373, which in turn interacts with  
1003 the phosphate groups of the cofactor. (C) In F subunit of apo-CrGSNOR1, the catalytic  
1004 zinc ion is coordinated with a distorted tetrahedral geometry by Cys48, Cys178, His70, and  
1005 a water molecule. Glu71 is uniquely involved in a salt-bridge with Arg373. (D) In A, B, D  
1006 and E subunits of apo-CrGSNOR1, the catalytic zinc ion is coordinated by five ligands  
1007 comprising Cys48, Cys178, His70, Glu71 and a water molecule. Glu71 keeps its  
1008 interaction with Arg373. (E) In the C subunit of apo-CrGSNOR1, the catalytic zinc ion is  
1009 coordinated by five ligands comprising Cys48, Cys178, His70, and two water molecules.  
1010 Glu71 is uniquely involved in double salt-bridge with Arg373. (F) In B and D subunits of  
1011 NAD<sup>+</sup>-CrGSNOR1, in close proximity to the catalytic zinc ion coordinated with a tetrahedral  
1012 geometry by Cys48, Cys178, His70, and Glu71, a water molecule is observed.  
1013

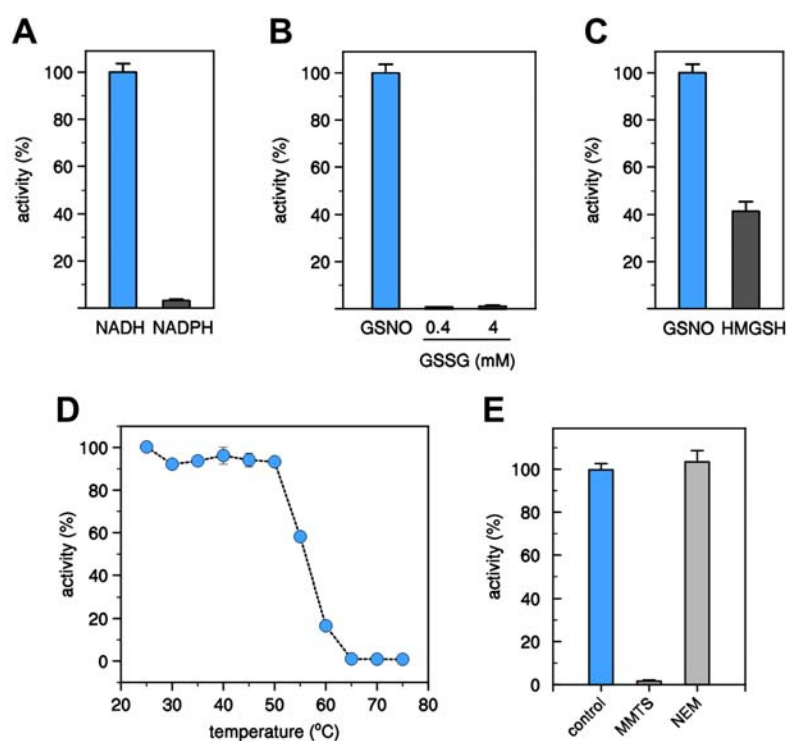

1014  
1015  
1016  
1017

### Figure 5. Kinetic analysis of CrGSNOR1

1018 (A) Cofactor specificity of CrGSNOR1 activity in the presence of GSNO. The activity of  
1019 CrGSNOR was evaluated in the presence of 0.4 mM GSNO using 0.2 mM NADH (white  
1020 bar) or 0.2 mM NADPH (black bar) as cofactor. Data are represented as mean  $\pm$  SD (n =  
1021 3). (B) Substrate specificity of CrGSNOR1 activity in the presence of NADH. The activity of  
1022 CrGSNOR was evaluated in the presence of 0.2 mM NADH using 0.4 mM GSNO (white  
1023 bar) or GSSG (0.4 or 4 mM, black bar) as substrate. Data are represented as mean  $\pm$  SD  
1024 (n = 3). (C) Activity of CrGSNOR1 as reductase or dehydrogenase. The activity of  
1025 CrGSNOR was evaluated using GSNO (white bar) or HMGSH (black bar) as described in  
1026 the Experimental section. Data are represented as mean  $\pm$  SD (n = 3). For panels A-C, the  
1027 NADH-dependent GSNO reduction of CrGSNOR1 (25 nM) was set to 100% ( $36.9 \pm 2.9$   
1028  $\mu\text{mol}/\text{min}/\text{mg}$ ). (D) Thermal stability of CrGSNOR1. The protein was incubated for 30 min  
1029 at variable temperatures and after incubation, the remaining activity was measured. Data  
1030 are represented as mean  $\pm$  SD (n = 3). (E) Inactivation treatments of CrGSNOR1 with  
1031 MMTS or NEM. CrGSNOR1 was incubated for 30 min in the presence of 1 mM MMTS or 1  
1032 mM NEM (gray bars). Data are represented as mean  $\pm$  SD (n = 3) of control activity  
1033 measured after protein incubation in the presence of buffer alone (light-blue bar).

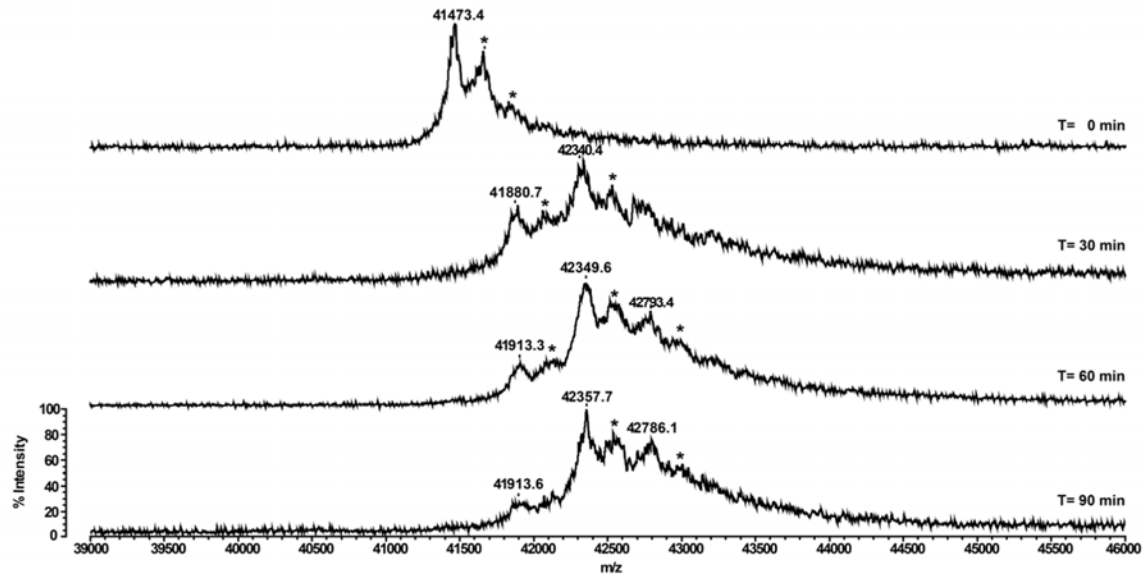

1034

1035 **Figure 6. Time-dependent mass spectrometry analyses of CrGSNOR1 treated with**  
1036 **Biotin-maleimide**

1037 Recombinant CrGSNOR1 was incubated in the presence of 1 mM Biotin-maleimide. At  
1038 indicated time points, protein samples were withdrawn and analyzed by MALDI-TOF MS to  
1039 assess the number of alkylated cysteines. For each alkylated cysteine, the molecular mass  
1040 of CrGSNOR1 is shifted by +451 Da compared to the native protein (41473.4 Da). Peaks  
1041 highlighted by an asterisk correspond to the protein-matrix (sinapinic acid) adduct. The y-  
1042 axis is equal for all mass spectra acquired at times 0, 30, 60, and 90 min, and only  
1043 indicated in the bottom spectrum.

1044

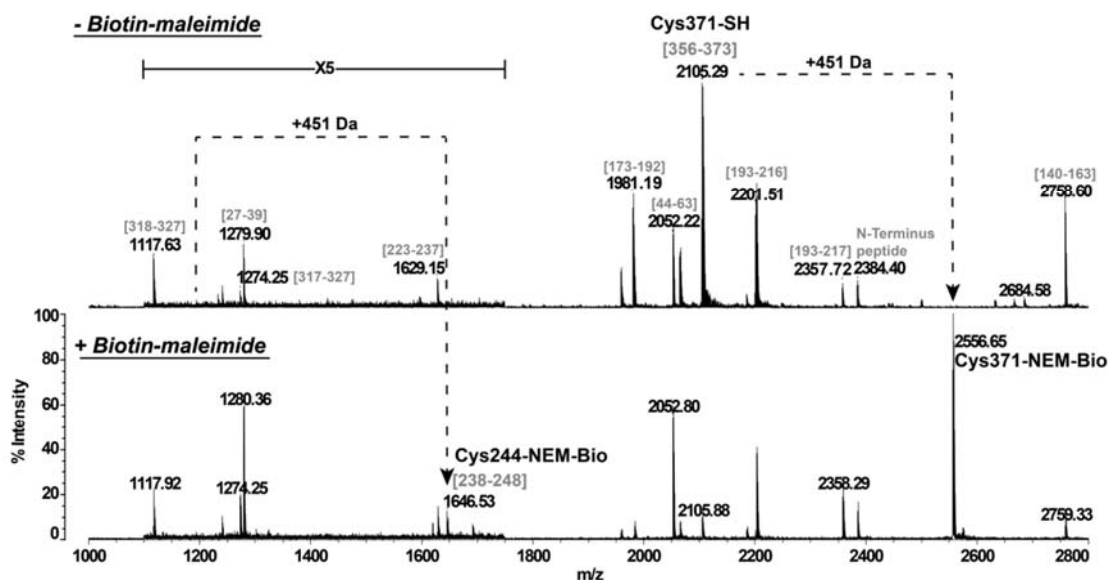

1045

1046 **Figure 7. Peptide mass fingerprinting of untreated or Biotin-maleimide-treated**  
1047 **CrGSNOR1**

1048 Recombinant CrGSNOR1 was incubated in the presence of 1 mM Biotin-maleimide for 20  
1049 min and then trypsin digested. The peptide mixture was analyzed by MALDI-TOF MS.  
1050 Sequence of peptides belonging to CrGSNOR1 is indicated in brackets (numbering  
1051 according to Figure 2). Cysteines modified by Biotin-maleimide are annotated with the  
1052 mention “NEM-Bio” and the peak corresponding to the peptide sequence [1-12] of  
1053 CrGSNOR1 is indicated as N-terminus peptide as it is fused with the 7xHis affinity  
1054 purification tag.

1055



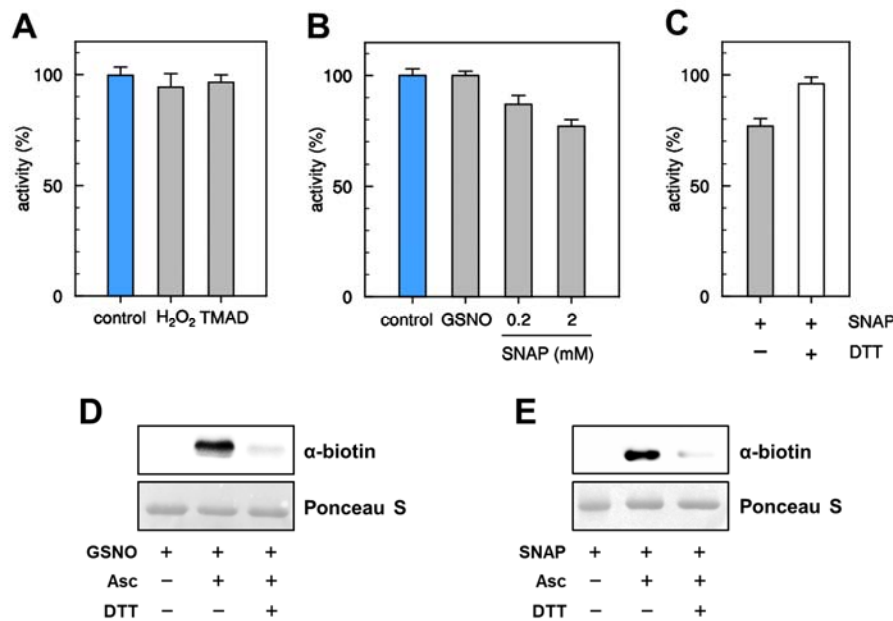

1056

1057 **Figure 8. Effects of oxidizing and nitrosylating agents on CrGSNOR1**

1058 **(A)** Incubation of CrGSNOR1 with oxidizing agents. CrGSNOR1 was incubated for 30 min  
 1059 in the presence of 1 mM H<sub>2</sub>O<sub>2</sub> or diamide (TMAD) (grey bars). Data are represented as  
 1060 mean ± SD (n = 3) of control activity measured after 30 min incubation in the absence of  
 1061 oxidizing agents (light blue bar). **(B)** Incubation of CrGSNOR1 with the nitrosylating agents  
 1062 GSNO and SNAP. CrGSNOR1 was incubated for 30 min in the presence of GSNO (2 mM)  
 1063 or SNAP (0.2 or 2 mM). Data are represented as mean ± SD (n = 3) of control activity  
 1064 measured after 30 min incubation in the absence of DEA-NO (white bar). **(C)** The  
 1065 reversibility of CrGSNOR1 inactivation by SNAP (2 mM, black bar) was assessed by  
 1066 incubation in the presence of 20 mM DTT (white bars). Data are represented as mean ±  
 1067 SD (n = 3) of control activity (see panel B). **(D-E)** S-nitrosylation of CrGSNOR1.  
 1068 CrGSNOR1 was treated for 30 min in the presence of 2 mM GSNO (D) or 2 mM SNAP (E)  
 1069 and nitrosylation was visualized using the biotin-switch technique followed by anti-biotin  
 1070 western blots as described in Material and Methods. For both panels, the red-ponceau  
 1071 (ponceau) staining of the membranes shows almost equal loading in each lane. Asc,  
 1072 ascorbate.

1073

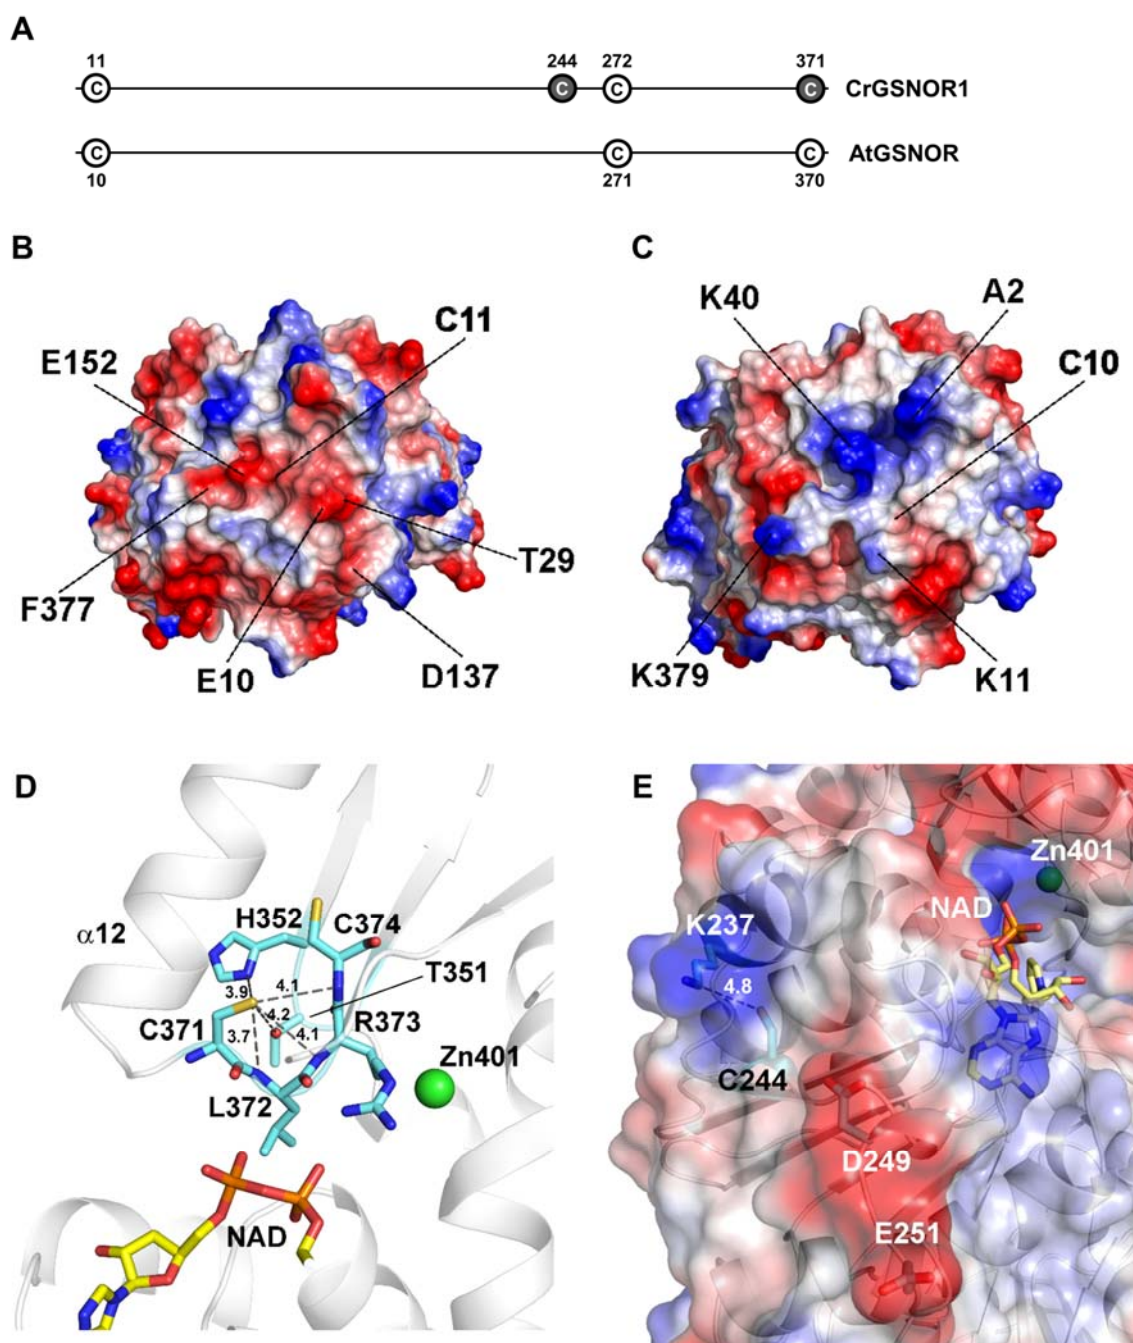

1074

1075 **Figure 9. Microenvironment of thiol-modified cysteine residues in algae and/or plant**  
 1076 **GSNORs**

1077 (A) Conservation of modified cysteine residues in CrGSNOR1 (alkylated Cys dark circle)  
 1078 and AtGSNOR (S-nitrosylated Cys white circle). Cys11 and Cys272 not modified in  
 1079 CrGSNOR1 are reported as a white circle. Electrostatic surface potential in the region  
 1080 surrounding Cys11 in CrGSNOR1 (B) and Cys10 in AtGSNOR (C). Specific residues  
 1081 determining the larger differences in surface potential between the two enzymes are

1082 indicated. The electrostatic surface potential ranges between -60 (red) and 60 (blue). **(D)**  
1083 CrGSNOR1 Cys371 lies in a loop that follows helix  $\alpha$ 12. Its thiol group is hydrogen-bonded  
1084 to the side chains and backbone nitrogen atoms of several surrounding residues. Cys371  
1085 overlooks the catalytic cavity containing the zinc ion and the cofactor. **(E)** The thiol group  
1086 of CrGSNOR1 Cys244 is hydrogen-bonded to the amino side chain group of Lys237,  
1087 which determines a positive surface electrostatic potential. The carboxylic group of Asp249  
1088 and Glu251 determine a negative region on the other side of Cys244 thiol group.  
1089  
1090

## Parsed Citations

**Adams PD, Afonine PV, Bunkoczi G, Chen VB, Davis IW, Echols N, Headd JJ, Hung LW, Kapral GJ, Grosse-Kunstleve RW, McCoy AJ, Moriarty NW, Oeffner R, Read RJ, Richardson DC, Richardson JS, Terwilliger TC, Zwart PH (2010) PHENIX: a comprehensive Python-based system for macromolecular structure solution. *Acta Crystallogr D Biol Crystallogr* 66: 213-221**

Pubmed: [Author and Title](#)

Google Scholar: [Author Only](#) [Title Only](#) [Author and Title](#)

**Ageeva-Kieferle A, Rudolf EE, Lindermayr C (2019) Redox-Dependent Chromatin Remodeling: A New Function of Nitric Oxide as Architect of Chromatin Structure in Plants. *Front Plant Sci* 10: 625**

Pubmed: [Author and Title](#)

Google Scholar: [Author Only](#) [Title Only](#) [Author and Title](#)

**Airaki M, Sanchez-Moreno L, Leterrier M, Barroso JB, Palma JM, Corpas FJ (2011) Detection and quantification of S-nitrosoglutathione (GSNO) in pepper (*Capsicum annuum* L.) plant organs by LC-ES/MS. *Plant Cell Physiol* 52: 2006-2015**

Pubmed: [Author and Title](#)

Google Scholar: [Author Only](#) [Title Only](#) [Author and Title](#)

**Askew SC, Butler AR, Flitney FW, Kemp GD, Megson IL (1995) Chemical mechanisms underlying the vasodilator and platelet anti-aggregating properties of S-nitroso-N-acetyl-DL-penicillamine and S-nitrosoglutathione. *Bioorg Med Chem* 3: 1-9**

Pubmed: [Author and Title](#)

Google Scholar: [Author Only](#) [Title Only](#) [Author and Title](#)

**Astier J, Kulik A, Koen E, Besson-Bard A, Bourque S, Jeandroz S, Lamotte O, Wendehenne D (2012) Protein S-nitrosylation: what's going on in plants? *Free Radic Biol Med* 53: 1101-1110**

Pubmed: [Author and Title](#)

Google Scholar: [Author Only](#) [Title Only](#) [Author and Title](#)

**Bai XG, Chen JH, Kong XX, Todd CD, Yang YP, Hu XY, Li DZ (2012) Carbon monoxide enhances the chilling tolerance of recalcitrant *Baccaurea ramiflora* seeds via nitric oxide-mediated glutathione homeostasis. *Free Radic Biol Med* 53: 710-720**

Pubmed: [Author and Title](#)

Google Scholar: [Author Only](#) [Title Only](#) [Author and Title](#)

**Bateman RL, Rauh D, Tavshanjian B, Shokat KM (2008) Human carbonyl reductase 1 is an S-nitrosoglutathione reductase. *J Biol Chem* 283: 35756-35762**

Pubmed: [Author and Title](#)

Google Scholar: [Author Only](#) [Title Only](#) [Author and Title](#)

**Becana M, Yruela I, Sarath G, Catalan P, Hargrove MS (2020) Plant hemoglobins: a journey from unicellular green algae to vascular plants. *New Phytol***

Pubmed: [Author and Title](#)

Google Scholar: [Author Only](#) [Title Only](#) [Author and Title](#)

**Becker K, Gui M, Schirmer RH (1995) Inhibition of human glutathione reductase by S-nitrosoglutathione. *Eur J Biochem* 234: 472-478**

Pubmed: [Author and Title](#)

Google Scholar: [Author Only](#) [Title Only](#) [Author and Title](#)

**Begara-Morales JC, Sanchez-Calvo B, Chaki M, Valderrama R, Mata-Perez C, Padilla MN, Corpas FJ, Barroso JB (2016) Antioxidant Systems are Regulated by Nitric Oxide-Mediated Post-translational Modifications (NO-PTMs). *Front Plant Sci* 7: 152**

Pubmed: [Author and Title](#)

Google Scholar: [Author Only](#) [Title Only](#) [Author and Title](#)

**Bellin D, Asai S, Delledonne M, Yoshioka H (2013) Nitric oxide as a mediator for defense responses. *Mol Plant Microbe Interact* 26: 271-277**

Pubmed: [Author and Title](#)

Google Scholar: [Author Only](#) [Title Only](#) [Author and Title](#)

**Berger H, De Mia M, Morisse S, Marchand CH, Lemaire SD, Wobbe L, Kruse O (2016) A Light Switch Based on Protein S-Nitrosylation Fine-Tunes Photosynthetic Light Harvesting in *Chlamydomonas*. *Plant Physiol* 171: 821-832**

Pubmed: [Author and Title](#)

Google Scholar: [Author Only](#) [Title Only](#) [Author and Title](#)

**Besson-Bard A, Pugin A, Wendehenne D (2008) New insights into nitric oxide signaling in plants. *Annu Rev Plant Biol* 59: 21-39**

Pubmed: [Author and Title](#)

Google Scholar: [Author Only](#) [Title Only](#) [Author and Title](#)

**Bischof JC, He X (2005) Thermal stability of proteins. *Ann N Y Acad Sci* 1066: 12-33**

Pubmed: [Author and Title](#)

Google Scholar: [Author Only](#) [Title Only](#) [Author and Title](#)

**Broniowska KA, Diers AR, Hogg N (2013) S-Nitrosoglutathione. *Biochim Biophys Acta***

Pubmed: [Author and Title](#)

Google Scholar: [Author Only](#) [Title Only](#) [Author and Title](#)

**Calatrava V, Chamizo-Ampudia A, Sanz-Luque E, Ocana-Calahorra F, Llamas A, Fernandez E, Galvan A (2017) How Chlamydomonas handles nitrate and the nitric oxide cycle. J Exp Bot 68: 2593-2602**

Pubmed: [Author and Title](#)

Google Scholar: [Author Only Title Only Author and Title](#)

**Chen L, Wu R, Feng J, Feng T, Wang C, Hu J, Zhan N, Li Y, Ma X, Ren B, Zhang J, Song CP, Li J, Zhou JM, Zuo J (2020) Transnitrosylation Mediated by the Non-canonical Catalase ROG1 Regulates Nitric Oxide Signaling in Plants. Dev Cell 53: 444-457 e445**

Pubmed: [Author and Title](#)

Google Scholar: [Author Only Title Only Author and Title](#)

**Chen VB, Arendall WB, 3rd, Headd JJ, Keedy DA, Immormino RM, Kapral GJ, Murray LW, Richardson JS, Richardson DC (2010) MolProbity: all-atom structure validation for macromolecular crystallography. Acta Crystallogr D Biol Crystallogr 66: 12-21**

Pubmed: [Author and Title](#)

Google Scholar: [Author Only Title Only Author and Title](#)

**Chen X, Tian D, Kong X, Chen Q, E FA, Hu X, Jia A (2016) The role of nitric oxide signalling in response to salt stress in Chlamydomonas reinhardtii. Planta 244: 651-669**

Pubmed: [Author and Title](#)

Google Scholar: [Author Only Title Only Author and Title](#)

**Cheng T, Chen J, Ef AA, Wang P, Wang G, Hu X, Shi J (2015) Quantitative proteomics analysis reveals that S-nitrosoglutathione reductase (GSNOR) and nitric oxide signaling enhance poplar defense against chilling stress. Planta 242: 1361-1390**

Pubmed: [Author and Title](#)

Google Scholar: [Author Only Title Only Author and Title](#)

**Corpas FJ, Alce JD, Barroso JB (2013) Current overview of S-nitrosoglutathione (GSNO) in higher plants. Front Plant Sci 4: 126**

Pubmed: [Author and Title](#)

Google Scholar: [Author Only Title Only Author and Title](#)

**Crozet P, Navarro FJ, Willmund F, Mehrshahi P, Bakowski K, Lauersen KJ, Perez-Perez ME, Auroy P, Gorchs Rovira A, Sauret-Gueto S, Niemeyer J, Spaniol B, Theis J, Trosch R, Westrich LD, Vavitsas K, Baier T, Hubner W, de Carpentier F, Cassarini M, Danon A, Henri J, Marchand CH, de Mia M, Sarkissian K, Baulcombe DC, Peltier G, Crespo JL, Kruse O, Jensen PE, Schroda M, Smith AG, Lemaire SD (2018) Birth of a Photosynthetic Chassis: A MoClo Toolkit Enabling Synthetic Biology in the Microalga Chlamydomonas reinhardtii. ACS Synth Biol 7: 2074-2086**

Pubmed: [Author and Title](#)

Google Scholar: [Author Only Title Only Author and Title](#)

**D'Ordine RL, Linger RS, Thai CJ, Davisson VJ (2012) Catalytic zinc site and mechanism of the metalloenzyme PR-AMP cyclohydrolase. Biochemistry 51: 5791-5803**

Pubmed: [Author and Title](#)

Google Scholar: [Author Only Title Only Author and Title](#)

**Daniel AG, Farrell NP (2014) The dynamics of zinc sites in proteins: electronic basis for coordination sphere expansion at structural sites. Metallomics 6: 2230-2241**

Pubmed: [Author and Title](#)

Google Scholar: [Author Only Title Only Author and Title](#)

**De Mia M, Lemaire SD, Choquet Y, Wollman FA (2019) Nitric Oxide Remodels the Photosynthetic Apparatus upon S-Starvation in Chlamydomonas reinhardtii. Plant Physiol 179: 718-731**

Pubmed: [Author and Title](#)

Google Scholar: [Author Only Title Only Author and Title](#)

**Del Castello F, Nejamkin A, Cassia R, Correa-Aragunde N, Fernandez B, Foresi N, Lombardo C, Ramirez L, Lamattina L (2019) The era of nitric oxide in plant biology: Twenty years tying up loose ends. Nitric Oxide 85: 17-27**

Pubmed: [Author and Title](#)

Google Scholar: [Author Only Title Only Author and Title](#)

**Emsley P, Cowtan K (2004) Coot: model-building tools for molecular graphics. Acta Crystallogr D Biol Crystallogr 60: 2126-2132**

Pubmed: [Author and Title](#)

Google Scholar: [Author Only Title Only Author and Title](#)

**Engeland K, Hoog JO, Holmquist B, Estonius M, Jornvall H, Vallee BL (1993) Mutation of Arg-115 of human class III alcohol dehydrogenase: a binding site required for formaldehyde dehydrogenase activity and fatty acid activation. Proc Natl Acad Sci U S A 90: 2491-2494**

Pubmed: [Author and Title](#)

Google Scholar: [Author Only Title Only Author and Title](#)

**Estonius M, Hoog JO, Danielsson O, Jornvall H (1994) Residues specific for class III alcohol dehydrogenase. Site-directed mutagenesis of the human enzyme. Biochemistry 33: 15080-15085**

Pubmed: [Author and Title](#)

Google Scholar: [Author Only Title Only Author and Title](#)

**Evans PR, Murshudov GN (2013) How good are my data and what is the resolution? Acta Crystallogr D Biol Crystallogr 69: 1204-1214**

Pubmed: [Author and Title](#)

Google Scholar: [Author Only Title Only Author and Title](#)

**Feechan A, Kwon E, Yun BW, Wang Y, Pallas JA, Loake GJ (2005) A central role for S-nitrosothiols in plant disease resistance. Proc Natl Acad Sci U S A 102: 8054-8059**

Pubmed: [Author and Title](#)

Google Scholar: [Author Only Title Only Author and Title](#)

**Feng J, Chen L, Zuo J (2019) Protein S-Nitrosylation in plants: Current progresses and challenges. J Integr Plant Biol 61: 1206-1223**

Pubmed: [Author and Title](#)

Google Scholar: [Author Only Title Only Author and Title](#)

**Foster MW, Liu L, Zeng M, Hess DT, Stamler JS (2009) A genetic analysis of nitrosative stress. Biochemistry 48: 792-799**

Pubmed: [Author and Title](#)

Google Scholar: [Author Only Title Only Author and Title](#)

**Frungillo L, Skelly MJ, Loake GJ, Spoel SH, Salgado I (2014) S-nitrosothiols regulate nitric oxide production and storage in plants through the nitrogen assimilation pathway. Nat Commun 5: 5401**

Pubmed: [Author and Title](#)

Google Scholar: [Author Only Title Only Author and Title](#)

**Gomis-Ruth FX, Stocker W, Huber R, Zwilling R, Bode W (1993) Refined 1.8 Å X-ray crystal structure of astacin, a zinc-endopeptidase from the crayfish *Astacus astacus* L. Structure determination, refinement, molecular structure and comparison with thermolysin. J Mol Biol 229: 945-968**

Pubmed: [Author and Title](#)

Google Scholar: [Author Only Title Only Author and Title](#)

**Guerra D, Ballard K, Truebridge I, Vierling E (2016) S-Nitrosation of Conserved Cysteines Modulates Activity and Stability of S-Nitrosogluthathione Reductase (GSNOR). Biochemistry 55: 2452-2464**

Pubmed: [Author and Title](#)

Google Scholar: [Author Only Title Only Author and Title](#)

**Gupta KJ, Kolbert Z, Durner J, Lindermayr C, Corpas FJ, Brouquisse R, Barroso JB, Umbreen S, Palma JM, Hancock JT, Petrivalsky M, Wendehenne D, Loake GJ (2020) Regulating the regulator: nitric oxide control of post-translational modifications. New Phytol**

Pubmed: [Author and Title](#)

Google Scholar: [Author Only Title Only Author and Title](#)

**Hart TW (1985) Some observations concerning the S-nitroso and S-phenylsulphonyl derivatives of L-cysteine and glutathione. Tetrahedron Letters 26: 2013-2016**

Pubmed: [Author and Title](#)

Google Scholar: [Author Only Title Only Author and Title](#)

**Hemschemeier A, Duner M, Casero D, Merchant SS, Winkler M, Happe T (2013) Hypoxic survival requires a 2-on-2 hemoglobin in a process involving nitric oxide. Proc Natl Acad Sci U S A 110: 10854-10859**

Pubmed: [Author and Title](#)

Google Scholar: [Author Only Title Only Author and Title](#)

**Holmes MA, Matthews BW (1981) Binding of hydroxamic acid inhibitors to crystalline thermolysin suggests a pentacoordinate zinc intermediate in catalysis. Biochemistry 20: 6912-6920**

Pubmed: [Author and Title](#)

Google Scholar: [Author Only Title Only Author and Title](#)

**Holmquist B, Vallee BL (1991) Human liver class III alcohol and glutathione dependent formaldehyde dehydrogenase are the same enzyme. Biochem Biophys Res Commun 178: 1371-1377**

Pubmed: [Author and Title](#)

Google Scholar: [Author Only Title Only Author and Title](#)

**Huang D, Huo J, Zhang J, Wang C, Wang B, Fang H, Liao W (2019) Protein S-nitrosylation in programmed cell death in plants. Cell Mol Life Sci 76: 1877-1887**

Pubmed: [Author and Title](#)

Google Scholar: [Author Only Title Only Author and Title](#)

**Jahnova J, Luhova L, Petrivalsky M (2019) S-Nitrosogluthathione Reductase-The Master Regulator of Protein S-Nitrosation in Plant NO Signaling. Plants (Basel) 8**

Pubmed: [Author and Title](#)

Google Scholar: [Author Only Title Only Author and Title](#)

**Jensen DE, Belka GK, Du Bois GC (1998) S-Nitrosogluthathione is a substrate for rat alcohol dehydrogenase class III isoenzyme. Biochem J 331 ( Pt 2): 659-668**

Pubmed: [Author and Title](#)

Google Scholar: [Author Only Title Only Author and Title](#)

**Kabsch W (2010) Xds. Acta Crystallogr D Biol Crystallogr 66: 125-132**

Pubmed: [Author and Title](#)

Google Scholar: [Author Only Title Only Author and Title](#)

**Kolbert Z, Barroso JB, Brouquisse R, Corpas FJ, Gupta KJ, Lindermayr C, Loake GJ, Palma JM, Petrivalsky M, Wendehenne D,**

**Hancock JT (2019) A forty year journey: The generation and roles of NO in plants. Nitric Oxide 93: 53-70**

Pubmed: [Author and Title](#)

Google Scholar: [Author Only](#) [Title Only](#) [Author and Title](#)

**Kovacs I, Holzmeister C, Wirtz M, Geerlof A, Frohlich T, Romling G, Kuruthukulangarakoola GT, Linster E, Hell R, Arnold GJ, Durner J, Lindermayr C (2016) ROS-Mediated Inhibition of S-nitrosoglutathione Reductase Contributes to the Activation of Anti-oxidative Mechanisms. Front Plant Sci 7: 1669**

Pubmed: [Author and Title](#)

Google Scholar: [Author Only](#) [Title Only](#) [Author and Title](#)

**Kubienova L, Kopečný D, Tylichová M, Briozzo P, Skopalová J, Sebelá M, Navrátil M, Tache R, Luhová L, Barroso JB, Petrivalský M (2013) Structural and functional characterization of a plant S-nitrosoglutathione reductase from *Solanum lycopersicum*. Biochimie 95: 889-902**

Pubmed: [Author and Title](#)

Google Scholar: [Author Only](#) [Title Only](#) [Author and Title](#)

**Kuo EY, Chang HL, Lin ST, Lee TM (2020) High Light-Induced Nitric Oxide Production Induces Autophagy and Cell Death in *Chlamydomonas reinhardtii*. Front Plant Sci 11: 772**

Pubmed: [Author and Title](#)

Google Scholar: [Author Only](#) [Title Only](#) [Author and Title](#)

**Lee U, Wie C, Fernandez BO, Feelisch M, Vierling E (2008) Modulation of nitrosative stress by S-nitrosoglutathione reductase is critical for thermotolerance and plant growth in *Arabidopsis*. Plant Cell 20: 786-802**

Pubmed: [Author and Title](#)

Google Scholar: [Author Only](#) [Title Only](#) [Author and Title](#)

**Lemaire SD, Richardson JM, Goyer A, Keryer E, Lancelin JM, Makhataдзе GI, Jacquot JP (2000) Primary structure determinants of the pH- and temperature-dependent aggregation of thioredoxin. Biochim Biophys Acta 1476: 311-323**

Pubmed: [Author and Title](#)

Google Scholar: [Author Only](#) [Title Only](#) [Author and Title](#)

**Li B, Sun L, Huang J, Goschl C, Shi W, Chory J, Busch W (2019) GSNOR provides plant tolerance to iron toxicity via preventing iron-dependent nitrosative and oxidative cytotoxicity. Nat Commun 10: 3896**

Pubmed: [Author and Title](#)

Google Scholar: [Author Only](#) [Title Only](#) [Author and Title](#)

**Lin A, Wang Y, Tang J, Xue P, Li C, Liu L, Hu B, Yang F, Loake GJ, Chu C (2012) Nitric oxide and protein S-nitrosylation are integral to hydrogen peroxide-induced leaf cell death in rice. Plant Physiol 158: 451-464**

Pubmed: [Author and Title](#)

Google Scholar: [Author Only](#) [Title Only](#) [Author and Title](#)

**Lindermayr C (2017) Crosstalk between reactive oxygen species and nitric oxide in plants: Key role of S-nitrosoglutathione reductase. Free Radic Biol Med**

Pubmed: [Author and Title](#)

Google Scholar: [Author Only](#) [Title Only](#) [Author and Title](#)

**Lindermayr C, Saalbach G, Durner J (2005) Proteomic identification of S-nitrosylated proteins in *Arabidopsis*. Plant Physiol 137: 921-930**

Pubmed: [Author and Title](#)

Google Scholar: [Author Only](#) [Title Only](#) [Author and Title](#)

**Liu L, Hausladen A, Zeng M, Que L, Heitman J, Stamler JS (2001) A metabolic enzyme for S-nitrosothiol conserved from bacteria to humans. Nature 410: 490-494**

Pubmed: [Author and Title](#)

Google Scholar: [Author Only](#) [Title Only](#) [Author and Title](#)

**Liu L, Yan Y, Zeng M, Zhang J, Hanes MA, Ahearn G, McMahon TJ, Dickfeld T, Marshall HE, Que LG, Stamler JS (2004) Essential roles of S-nitrosothiols in vascular homeostasis and endotoxic shock. Cell 116: 617-628**

Pubmed: [Author and Title](#)

Google Scholar: [Author Only](#) [Title Only](#) [Author and Title](#)

**Lushchak OV, Nykorak NZ, Ohdate T, Inoue Y, Lushchak VI (2009) Inactivation of genes encoding superoxide dismutase modifies yeast response to S-nitrosoglutathione-induced stress. Biochemistry (Mosc) 74: 445-451**

Pubmed: [Author and Title](#)

Google Scholar: [Author Only](#) [Title Only](#) [Author and Title](#)

**Marchand CH, Fermani S, Rossi J, Gurrieri L, Tedesco D, Henri J, Sparla F, Trost P, Lemaire SD, Zaffagnini M (2019) Structural and Biochemical Insights into the Reactivity of Thioredoxin h1 from *Chlamydomonas reinhardtii*. Antioxidants (Basel) 8**

Pubmed: [Author and Title](#)

Google Scholar: [Author Only](#) [Title Only](#) [Author and Title](#)

**Maret W, Li Y (2009) Coordination dynamics of zinc in proteins. Chem Rev 109: 4682-4707**

Pubmed: [Author and Title](#)

Google Scholar: [Author Only](#) [Title Only](#) [Author and Title](#)

**Matamoros MA, Cutrona MC, Wienkoop S, Begara-Morales JC, Sandal N, Orera I, Barroso JB, Stougaard J, Becana M (2020) Altered**

**Plant and Nodule Development and Protein S-Nitrosylation in Lotus japonicus Mutants Deficient in S-Nitrosogluthione Reductases. Plant Cell Physiol 61: 105-117**

Pubmed: [Author and Title](#)

Google Scholar: [Author Only Title Only Author and Title](#)

**Matthews BW (1968) Solvent content of protein crystals. J Mol Biol 33: 491-497**

Pubmed: [Author and Title](#)

Google Scholar: [Author Only Title Only Author and Title](#)

**McCall KA, Huang C, Fierke CA (2000) Function and mechanism of zinc metalloenzymes. J Nutr 130: 1437S-1446S**

Pubmed: [Author and Title](#)

Google Scholar: [Author Only Title Only Author and Title](#)

**Merchant SS, Prochnik SE, Vallon O, Harris EH, Karpowicz SJ, Witman GB, Terry A, Salamov A, Fritz-Laylin LK, Marechal-Drouard L, Marshall WF, Qu LH, Nelson DR, Sanderfoot AA, Spalding MH, Kapitonov VV, Ren Q, Ferris P, Lindquist E, Shapiro H, Lucas SM, Grimwood J, Schmutz J, Cardol P, Cerutti H, Chanfreau G, Chen CL, Cognat V, Croft MT, Dent R, Dutcher S, Fernandez E, Fukuzawa H, Gonzalez-Ballester D, Gonzalez-Halphen D, Hallmann A, Hanikenne M, Hippler M, Inwood W, Jabbari K, Kalanon M, Kuras R, Lefebvre PA, Lemaire SD, Lobanov AV, Lohr M, Manuell A, Meier I, Mets L, Mittag M, Mittelmeier T, Moroney JV, Moseley J, Napoli C, Nedelcu AM, Niyogi K, Novoselov SV, Paulsen IT, Pazour G, Purton S, Ral JP, Riano-Pachon DM, Riekhof W, Rymarquis L, Schroda M, Stern D, Umen J, Willows R, Wilson N, Zimmer SL, Allmer J, Balk J, Bisova K, Chen CJ, Elias M, Gendler K, Hauser C, Lamb MR, Ledford H, Long JC, Minagawa J, Page MD, Pan J, Pootakham W, Roje S, Rose A, Stahlberg E, Terauchi AM, Yang P, Ball S, Bowler C, Dieckmann CL, Gladyshev VN, Green P, Jorgensen R, Mayfield S, Mueller-Roeber B, Rajamani S, Sayre RT, Brokstein P, Dubchak I, Goodstein D, Hornick L, Huang YW, Jhaveri J, Luo Y, Martinez D, Ngau WC, Otilar B, Poliakov A, Porter A, Szajkowski L, Werner G, Zhou K, Grigoriev IV, Rokhsar DS, Grossman AR (2007) The Chlamydomonas genome reveals the evolution of key animal and plant functions. Science 318: 245-250**

Pubmed: [Author and Title](#)

Google Scholar: [Author Only Title Only Author and Title](#)

**Michelet L, Roach T, Fischer BB, Bedhomme M, Lemaire SD, Krieger-Liszak A (2013) Down-regulation of catalase activity allows transient accumulation of a hydrogen peroxide signal in Chlamydomonas reinhardtii. Plant Cell Environ 36: 1204-1213**

Pubmed: [Author and Title](#)

Google Scholar: [Author Only Title Only Author and Title](#)

**Morisse S, Zaffagnini M, Gao XH, Lemaire SD, Marchand CH (2014) Insight into protein S-nitrosylation in Chlamydomonas reinhardtii. Antioxid Redox Signal 21: 1271-1284**

Pubmed: [Author and Title](#)

Google Scholar: [Author Only Title Only Author and Title](#)

**Murshudov GN, Skubak P, Lebedev AA, Pannu NS, Steiner RA, Nicholls RA, Winn MD, Long F, Vagin AA (2011) REFMAC5 for the refinement of macromolecular crystal structures. Acta Crystallogr D Biol Crystallogr 67: 355-367**

Pubmed: [Author and Title](#)

Google Scholar: [Author Only Title Only Author and Title](#)

**Neill S, Barros R, Bright J, Desikan R, Hancock J, Harrison J, Morris P, Ribeiro D, Wilson I (2008) Nitric oxide, stomatal closure, and abiotic stress. J Exp Bot 59: 165-176**

Pubmed: [Author and Title](#)

Google Scholar: [Author Only Title Only Author and Title](#)

**Noctor G, Mhamdi A, Chaouch S, Han Y, Neukermans J, Marquez-Garcia B, Queval G, Foyer CH (2012) Glutathione in plants: an integrated overview. Plant Cell Environ 35: 454-484**

Pubmed: [Author and Title](#)

Google Scholar: [Author Only Title Only Author and Title](#)

**Okado-Matsumoto A, Fridovich I (2007) Putative denitrosylase activity of Cu,Zn-superoxide dismutase. Free Radic Biol Med 43: 830-836**

Pubmed: [Author and Title](#)

Google Scholar: [Author Only Title Only Author and Title](#)

**Pace CN, Vajdos F, Fee L, Grimsley G, Gray T (1995) How to measure and predict the molar absorption coefficient of a protein. Protein Sci 4: 2411-2423**

Pubmed: [Author and Title](#)

Google Scholar: [Author Only Title Only Author and Title](#)

**Pasquini M, Fermani S, Tedesco D, Sciabolini C, Crozet P, Naldi M, Henri J, Vothknecht U, Bertucci C, Lemaire SD, Zaffagnini M, Francia F (2017) Structural basis for the magnesium-dependent activation of transketolase from Chlamydomonas reinhardtii. Biochim Biophys Acta Gen Subj 1861: 2132-2145**

Pubmed: [Author and Title](#)

Google Scholar: [Author Only Title Only Author and Title](#)

**Pérez-Pérez ME, Mauriès A, Maes A, Tourasse NJ, Hamon M, Lemaire SD, Marchand CH (2017) The Deep Thioredoxome in Chlamydomonas reinhardtii: New Insights into Redox Regulation. Mol Plant 10: 1107-1125**

Pubmed: [Author and Title](#)

Google Scholar: [Author Only Title Only Author and Title](#)

**Pokora W, Aksmann A, Bascik-Remisiewicz A, Dettlaff-Pokora A, Rykaczewski M, Gappa M, Tukaj Z (2017) Changes in nitric**



**oxide/hydrogen peroxide content and cell cycle progression: Study with synchronized cultures of green alga *Chlamydomonas reinhardtii*. J Plant Physiol 208: 84-93**

Pubmed: [Author and Title](#)

Google Scholar: [Author Only](#) [Title Only](#) [Author and Title](#)

**Ren X, Sengupta R, Lu J, Lundberg JO, Holmgren A (2019) Characterization of mammalian glutaredoxin isoforms as S-nitrosylases. FEBS Lett 593: 1799-1806**

Pubmed: [Author and Title](#)

Google Scholar: [Author Only](#) [Title Only](#) [Author and Title](#)

**Robert X, Gouet P (2014) Deciphering key features in protein structures with the new ENDscript server. Nucleic Acids Res 42: W320-324**

Pubmed: [Author and Title](#)

Google Scholar: [Author Only](#) [Title Only](#) [Author and Title](#)

**Rouhier N, Lemaire SD, Jacquot JP (2008) The role of glutathione in photosynthetic organisms: emerging functions for glutaredoxins and glutathionylation. Annu Rev Plant Biol 59: 143-166**

Pubmed: [Author and Title](#)

Google Scholar: [Author Only](#) [Title Only](#) [Author and Title](#)

**Sakamoto A, Ueda M, Morikawa H (2002) Arabidopsis glutathione-dependent formaldehyde dehydrogenase is an S-nitrosoglutathione reductase. FEBS Lett 515: 20-24**

Pubmed: [Author and Title](#)

Google Scholar: [Author Only](#) [Title Only](#) [Author and Title](#)

**Sanghani PC, Bosron WF, Hurley TD (2002) Human glutathione-dependent formaldehyde dehydrogenase. Structural changes associated with ternary complex formation. Biochemistry 41: 15189-15194**

Pubmed: [Author and Title](#)

Google Scholar: [Author Only](#) [Title Only](#) [Author and Title](#)

**Sanghani PC, Davis WJ, Zhai L, Robinson H (2006) Structure-function relationships in human glutathione-dependent formaldehyde dehydrogenase. Role of Glu-67 and Arg-368 in the catalytic mechanism. Biochemistry 45: 4819-4830**

Pubmed: [Author and Title](#)

Google Scholar: [Author Only](#) [Title Only](#) [Author and Title](#)

**Sanz-Luque E, Ocana-Calahorra F, Llamas A, Galvan A, Fernandez E (2013) Nitric oxide controls nitrate and ammonium assimilation in *Chlamydomonas reinhardtii*. J Exp Bot 64: 3373-3383**

Pubmed: [Author and Title](#)

Google Scholar: [Author Only](#) [Title Only](#) [Author and Title](#)

**Scaife MA, Nguyen G, Rico J, Lambert D, Helliwell KE, Smith AG (2015) Establishing *Chlamydomonas reinhardtii* as an industrial biotechnology host. Plant J 82: 532-546**

Pubmed: [Author and Title](#)

Google Scholar: [Author Only](#) [Title Only](#) [Author and Title](#)

**Scaife MA, Smith AG (2016) Towards developing algal synthetic biology. Biochem Soc Trans 44: 716-722**

Pubmed: [Author and Title](#)

Google Scholar: [Author Only](#) [Title Only](#) [Author and Title](#)

**Sengupta R, Holmgren A (2012) The role of thioredoxin in the regulation of cellular processes by S-nitrosylation. Biochim Biophys Acta 1820: 689-700**

Pubmed: [Author and Title](#)

Google Scholar: [Author Only](#) [Title Only](#) [Author and Title](#)

**Shao N, Beck CF, Lemaire SD, Krieger-Liszka A (2008) Photosynthetic electron flow affects H<sub>2</sub>O (2) signaling by inactivation of catalase in *Chlamydomonas reinhardtii*. Planta 228: 1055-1066**

Pubmed: [Author and Title](#)

Google Scholar: [Author Only](#) [Title Only](#) [Author and Title](#)

**Shao Z, Borde C, Marchand CH, Lemaire SD, Busson P, Gozlan JM, Escargueil A, Marechal V (2019) Detection of IgG directed against a recombinant form of Epstein-Barr virus BALF0/1 protein in patients with nasopharyngeal carcinoma. Protein Expr Purif 162: 44-50**

Pubmed: [Author and Title](#)

Google Scholar: [Author Only](#) [Title Only](#) [Author and Title](#)

**Sievers F, Wilm A, Dineen D, Gibson TJ, Karplus K, Li W, Lopez R, McWilliam H, Remmert M, Soding J, Thompson JD, Higgins DG (2011) Fast, scalable generation of high-quality protein multiple sequence alignments using Clustal Omega. Mol Syst Biol 7: 539**

Pubmed: [Author and Title](#)

Google Scholar: [Author Only](#) [Title Only](#) [Author and Title](#)

**Skelly MJ, Malik SI, Le Bihan T, Bo Y, Jiang J, Spoel SH, Loake GJ (2019) A role for S-nitrosylation of the SUMO-conjugating enzyme SCE1 in plant immunity. Proc Natl Acad Sci U S A 116: 17090-17095**

Pubmed: [Author and Title](#)

Google Scholar: [Author Only](#) [Title Only](#) [Author and Title](#)

**Sreerama N, Woody RW (2000) Estimation of protein secondary structure from circular dichroism spectra: comparison of CONTIN,**

**SELCON, and CDSSTR methods with an expanded reference set. *Anal Biochem* 287: 252-260**

Pubmed: [Author and Title](#)

Google Scholar: [Author Only Title Only Author and Title](#)

**Stomberski CT, Anand P, Venetos NM, Hausladen A, Zhou HL, Premont RT, Stamler JS (2019) AKR1A1 is a novel mammalian S-nitroso-glutathione reductase. *J Biol Chem* 294: 18285-18293**

Pubmed: [Author and Title](#)

Google Scholar: [Author Only Title Only Author and Title](#)

**Stomberski CT, Hess DT, Stamler JS (2019) Protein S-Nitrosylation: Determinants of Specificity and Enzymatic Regulation of S-Nitrosothiol-Based Signaling. *Antioxid Redox Signal* 30: 1331-1351**

Pubmed: [Author and Title](#)

Google Scholar: [Author Only Title Only Author and Title](#)

**Ticha T, Cincalova L, Kopecny D, Sedlarova M, Kopecna M, Luhova L, Petrivalsky M (2017) Characterization of S-nitrosogluthathione reductase from Brassica and Lactuca spp. and its modulation during plant development. *Nitric Oxide* 68: 68-76**

Pubmed: [Author and Title](#)

Google Scholar: [Author Only Title Only Author and Title](#)

**Ticha T, Lochman J, Cincalova L, Luhova L, Petrivalsky M (2017) Redox regulation of plant S-nitrosogluthathione reductase activity through post-translational modifications of cysteine residues. *Biochem Biophys Res Commun* 494: 27-33**

Pubmed: [Author and Title](#)

Google Scholar: [Author Only Title Only Author and Title](#)

**Umbreen S, Lubega J, Cui B, Pan Q, Jiang J, Loake GJ (2018) Specificity in nitric oxide signalling. *J Exp Bot* 69: 3439-3448**

Pubmed: [Author and Title](#)

Google Scholar: [Author Only Title Only Author and Title](#)

**Vagin A, Teplyakov A (2010) Molecular replacement with MOLREP. *Acta Crystallogr D Biol Crystallogr* 66: 22-25**

Pubmed: [Author and Title](#)

Google Scholar: [Author Only Title Only Author and Title](#)

**van Stokkum IH, Spoelder HJ, Bloemendal M, van Grondelle R, Groen FC (1990) Estimation of protein secondary structure and error analysis from circular dichroism spectra. *Anal Biochem* 191: 110-118**

Pubmed: [Author and Title](#)

Google Scholar: [Author Only Title Only Author and Title](#)

**Vavitsas K, Crozet P, Vinde MH, Davies F, Lemaire SD, Vickers CE (2019) The Synthetic Biology Toolkit for Photosynthetic Microorganisms. *Plant Physiol* 181: 14-27**

Pubmed: [Author and Title](#)

Google Scholar: [Author Only Title Only Author and Title](#)

**Wallace AC, Laskowski RA, Thornton JM (1995) LIGPLOT: a program to generate schematic diagrams of protein-ligand interactions. *Protein Eng* 8: 127-134**

Pubmed: [Author and Title](#)

Google Scholar: [Author Only Title Only Author and Title](#)

**Wei L, Derrien B, Gautier A, Houille-Vernes L, Boulouis A, Saint-Marcoux D, Malnoe A, Rappaport F, de Vitry C, Vallon O, Choquet Y, Wollman FA (2014) Nitric oxide-triggered remodeling of chloroplast bioenergetics and thylakoid proteins upon nitrogen starvation in *Chlamydomonas reinhardtii*. *Plant Cell* 26: 353-372**

Pubmed: [Author and Title](#)

Google Scholar: [Author Only Title Only Author and Title](#)

**Whitmore L, Wallace BA (2004) DICHROWEB, an online server for protein secondary structure analyses from circular dichroism spectroscopic data. *Nucleic Acids Res* 32: W668-673**

Pubmed: [Author and Title](#)

Google Scholar: [Author Only Title Only Author and Title](#)

**Wijffels RH, Kruse O, Hellingwerf KJ (2013) Potential of industrial biotechnology with cyanobacteria and eukaryotic microalgae. *Curr Opin Biotechnol* 24: 405-413**

Pubmed: [Author and Title](#)

Google Scholar: [Author Only Title Only Author and Title](#)

**Wilson DK, Quijcho FA (1993) A pre-transition-state mimic of an enzyme: X-ray structure of adenosine deaminase with bound 1-deazaadenosine and zinc-activated water. *Biochemistry* 32: 1689-1694**

Pubmed: [Author and Title](#)

Google Scholar: [Author Only Title Only Author and Title](#)

**Xu S, Guerra D, Lee U, Vierling E (2013) S-nitrosogluthathione reductases are low-copy number, cysteine-rich proteins in plants that control multiple developmental and defense responses in *Arabidopsis*. *Front Plant Sci* 4: 430**

Pubmed: [Author and Title](#)

Google Scholar: [Author Only Title Only Author and Title](#)

**Yu M, Lamattina L, Spoel SH, Loake GJ (2014) Nitric oxide function in plant biology: a redox cue in deconvolution. *New Phytol* 202: 1142-1156**

Pubmed: [Author and Title](#)

Google Scholar: [Author Only Title Only Author and Title](#)

**Yu Z, Cao J, Zhu S, Zhang L, Peng Y, Shi J (2020) Exogenous Nitric Oxide Enhances Disease Resistance by Nitrosylation and Inhibition of S-Nitrosoglutathione Reductase in Peach Fruit. Front Plant Sci 11: 543**

Pubmed: [Author and Title](#)

Google Scholar: [Author Only Title Only Author and Title](#)

**Zaffagnini M, Bedhomme M, Groni H, Marchand CH, Puppo C, Gontero B, Cassier-Chauvat C, Decottignies P, Lemaire SD (2012) Glutathionylation in the photosynthetic model organism *Chlamydomonas reinhardtii*: a proteomic survey. Mol Cell Proteomics 11: M111 014142**

Pubmed: [Author and Title](#)

Google Scholar: [Author Only Title Only Author and Title](#)

**Zaffagnini M, De Mia M, Morisse S, Di Giacinto N, Marchand CH, Maes A, Lemaire SD, Trost P (2016) Protein S-nitrosylation in photosynthetic organisms: A comprehensive overview with future perspectives. Biochim Biophys Acta 1864: 952-966**

Pubmed: [Author and Title](#)

Google Scholar: [Author Only Title Only Author and Title](#)

**Zaffagnini M, Fermani S, Marchand CH, Costa A, Sparla F, Rouhier N, Geigenberger P, Lemaire SD, Trost P (2019) Redox Homeostasis in Photosynthetic Organisms: Novel and Established Thiol-Based Molecular Mechanisms. Antioxid Redox Signal 31: 155-210**

Pubmed: [Author and Title](#)

Google Scholar: [Author Only Title Only Author and Title](#)

**Zaffagnini M, Marchand CH, Malferrari M, Murail S, Bonacchi S, Genovese D, Montalti M, Venturoli G, Falini G, Baaden M, Lemaire SD, Fermani S, Trost P (2019) Glutathionylation primes soluble glyceraldehyde-3-phosphate dehydrogenase for late collapse into insoluble aggregates. Proc Natl Acad Sci U S A 116: 26057-26065**

Pubmed: [Author and Title](#)

Google Scholar: [Author Only Title Only Author and Title](#)

**Zaffagnini M, Michelet L, Sciabolini C, Di Giacinto N, Morisse S, Marchand CH, Trost P, Fermani S, Lemaire SD (2014) High-resolution crystal structure and redox properties of chloroplastic triosephosphate isomerase from *Chlamydomonas reinhardtii*. Mol Plant 7: 101-120**

Pubmed: [Author and Title](#)

Google Scholar: [Author Only Title Only Author and Title](#)

**Zaffagnini M, Morisse S, Bedhomme M, Marchand CH, Festa M, Rouhier N, Lemaire SD, Trost P (2013) Mechanisms of nitrosylation and denitrosylation of cytoplasmic glyceraldehyde-3-phosphate dehydrogenase from *Arabidopsis thaliana*. J Biol Chem 288: 22777-22789**

Pubmed: [Author and Title](#)

Google Scholar: [Author Only Title Only Author and Title](#)

**Zalutskaya Z, Kochemasova L, Ermilova E (2018) Dual positive and negative control of *Chlamydomonas* PII signal transduction protein expression by nitrate/nitrite and NO via the components of nitric oxide cycle. BMC Plant Biol 18: 305**

Pubmed: [Author and Title](#)

Google Scholar: [Author Only Title Only Author and Title](#)

**Zhan N, Wang C, Chen L, Yang H, Feng J, Gong X, Ren B, Wu R, Mu J, Li Y, Liu Z, Zhou Y, Peng J, Wang K, Huang X, Xiao S, Zuo J (2018) S-Nitrosylation Targets GSNO Reductase for Selective Autophagy during Hypoxia Responses in Plants. Mol Cell 71: 142-154 e146**

Pubmed: [Author and Title](#)

Google Scholar: [Author Only Title Only Author and Title](#)

**Zhang T, Ma M, Chen T, Zhang L, Fan L, Zhang W, Wei B, Li S, Xuan W, Noctor G, Han Y (2020) Glutathione-dependent denitrosation of GSNOR1 promotes oxidative signalling downstream of H<sub>2</sub>O<sub>2</sub>. Plant Cell Environ**

Pubmed: [Author and Title](#)

Google Scholar: [Author Only Title Only Author and Title](#)
